# Supplementary material for: A 3-year time series of volatile organic iodocarbons in Bedford Basin, Nova Scotia: a northwestern Atlantic fjord
Source: Copernicus journal article supplement (doi:10.5194/os-14-1385-2018), 2018-11-08
Supplement: Supplementary file 1 [file data supply_iodocarbons_BB_Shi.xlsx]

## Sheet: Sheet1
Date	depth(m)	CH3I(pmol/L)	CH2ClI(pmol/L)	CH2I2(pmol/L)	Chl α (μg/l)	Oxygen (ml/l)	Salinity (psu)	Temperature (deg C)	Fluorescence (ug/L)	NH4+(umol/L)	NO3-(umol/L)	NO2-(umol/L)		Date	Insolation Incident (kWh/m^2/day)	windspeed (m/s)
2015-01-07	1	NaN	NaN	NaN	1.59647	6.7247	29.8439	3.6134	1.0158	2.07	8.43	0.3		2015-01-01	1.45	2.47685
2015-01-14	1	NaN	NaN	NaN	0.552531	NaN	29.9647	3.1378	1.1113	2.82	8.72	0.29		2015-01-02	1.47	7.11806
2015-01-21	1	NaN	NaN	NaN	2.17931	6.3931	30.2025	3.6008	1.2437	2.3	6.6	0.26		2015-01-03	2.05	6.5162
2015-01-29	1	NaN	NaN	NaN	1.93435	7.1388	28.7584	1.7899	1.5916	2.89	6.58	0.27		2015-01-04	0.16	4.86111
2015-02-04	1	NaN	NaN	NaN	0.4858	7.2889	29.333	0.5778	0.8801	3	6.28	0.22		2015-01-05	1.92	9.83796
2015-02-11	1	NaN	NaN	NaN	2.98954	NaN	29.5978	0.0887	0.5815	3.23	5.76	0.22		2015-01-06	1.91	8.25231
2015-02-19	1	NaN	NaN	NaN	2.39893	7.6084	29.7457	-0.2702	1.4644	3.3	5.08	0.21		2015-01-07	1.72	2.09491
2015-02-25	1	NaN	NaN	NaN	2.96285	7.6983	29.6833	-0.3533	1.6804	3.69	5.44	0.23		2015-01-08	2.03	5.12731
2015-03-04	1	NaN	NaN	NaN	4.29746	7.9892	29.7802	-0.0069	2.7804	2.87	7.02	0.22		2015-01-09	0.41	6.89815
2015-03-11	1	NaN	NaN	NaN	7.39377	8.2225	30.0864	1.0219	5.2594	0.99	5.7	0.19		2015-01-10	1.96	3.51852
2015-03-17	1	NaN	NaN	NaN	10.1363	7.9123	30.3997	0.67	1.5641	0.71	5.76	0.18		2015-01-11	2.03	3.22917
2015-03-25	1	NaN	NaN	NaN	6.21931	9.1547	30.18	0.63	3.4029	2.77	1.47	0.2		2015-01-12	0.6	4.96528
2015-04-01	1	NaN	NaN	NaN	6.91331	10.4542	28.26	1.72	2.2265	0.51	0	0.1		2015-01-13	1.6	4.44444
2015-04-08	1	NaN	NaN	NaN	3.65685	9.9663	28.52	1.93	NaN	0.81	0.31	0.09		2015-01-14	2.27	1.90972
2015-04-15	1	NaN	NaN	NaN	0.608585	10.0338	28.0996	3.255	4.4543	4.28	5.54	0.21		2015-01-15	1.42	2.17593
2015-04-20	1	NaN	NaN	NaN	2.66923	9.4511	22.62	5.3	2.2487	2.01	2.28	0.17		2015-01-16	1.51	4.96528
2015-04-29	1	NaN	NaN	NaN	5.04485	8.8622	24.8779	3.1644	4.7027	1.37	0.43	0.13		2015-01-17	2.39	7.67361
2015-05-06	1	NaN	NaN	NaN	2.35669	8.4704	25.3243	7.3991	2.0334	1.18	0.38	0.13		2015-01-18	1.76	3.87731
2015-05-13	1	NaN	NaN	NaN	0.912269	7.07	26.8776	7.2822	1.8204	5.65	1.07	0.14		2015-01-19	0.54	7.99769
2015-05-20	1	NaN	NaN	NaN	4.56438	7.7341	28.515	8.242	8.2209	2	1.77	0.19		2015-01-20	1.85	3.4375
2015-05-27	1	4.25232	2.67388	6.56966	1.115	7.19	29.46	7.47	1.64	7.83	1.65	0.22		2015-01-21	2.48	4.94213
2015-06-03	1	6.04284	54.0863	28.2648	7.13	6.89	27.42	9.07	6.61	3.06	3.01	0.24		2015-01-22	0.3	3.34491
2015-06-10	1	3.06032	9.01965	6.65677	1.94	7.61	27.87	10.25	3.15	0.36	0	0.11		2015-01-23	2.47	5.55556
2015-06-17	1	11.1089	5.45655	4.23549	3.63	7.41	28.5	10.04	2.06	0.92	0.29	0.13		2015-01-24	0.96	6.35417
2015-06-24	1	8.27332	2.10549	5.94932	3.28	7.41	28.44	11.4	5.33	0.86	0.17	0.12		2015-01-25	1.48	9.15509
2015-06-30	1	15.5408	1.37967	3.24929	3.63	7.05	27.96	13.33	1.94	2.1	0.77	0.19		2015-01-26	2.66	5.11574
2015-07-08	1	26.1121	1.41019	1.05532	5.5	6.93	27.66	16.88	NaN	0.32	0	0.09		2015-01-27	0.83	4.38657
2015-07-15	1	18.3971	11.0813	20.7374	3.15	6.26	27.99	19.06	4.41	2.28	0	0.09		2015-01-28	2.09	3.19444
2015-07-22	1	23.1761	162.814	100.165	3.6	6.24	28.73	16.01	7.33	1.3	0	0.11		2015-01-29	2.74	2.53472
2015-07-29	1	22.0307	66.7788	26.4787	6.25	6.36	28.8	17.37	10.18	0.46	0	0.11		2015-01-30	1.87	2.1412
2015-08-05	1	17.1528	42.207	19.765	2.78	6.06	28.04	19.63	6.25	0.46	0	0.08		2015-01-31	1.06	4.09722
2015-08-12	1	7.72115	28.3026	32.9906	3.5	6.66	28.84	15.24	7.61	0.85	0	0.08		2015-02-01	2.6	9.94213
2015-08-19	1	NaN	NaN	NaN	2.37	7.92	28.79	19.83	3.7	0.75	0	0.08		2015-02-02	1.17	4.0942
2015-08-26	1	24.5319	72.9719	40.6062	3.97	6.18	28.29	21.37	4.96	0.78	0	0.1		2015-02-03	2.82	7.65046
2015-09-02	1	37.9843	70.2123	31.1562	3.18	5.97	29.27	18.64	4.24	0.96	0	0.09		2015-02-04	NaN	3.42593
2015-09-09	1	39.0113	78.0061	40.3065	5.03	6	29.38	18.25	8.5	0.64	0	0		2015-02-05	0.46	4.50758
2015-09-17	1	15.9466	62.2729	2.88926	5.08	6.89	29.38	16.27	2.19	0.71	0	0		2015-02-06	3.02	6.64352
2015-09-23	1	11.2699	33.1533	4.01831	3.13	6.64	29.09	15.99	3.1	0.61	0	0		2015-02-07	2.48	2.8125
2015-09-30	1	13.6616	66.5247	56.1876	9.05	6.62	30.11	14.8	3.5	0.74	0	0		2015-02-08	2.17	2.5
2015-10-07	1	9.93651	57.7904	19.045	NaN	6.41	28.63	14.01	14.33	0.66	0	0.12		2015-02-09	2.3	4.00463
2015-10-15	1	8.08913	41.9051	30.2395	11.84	6.53	27.6	14.11	20.01	0.48	0	0.14		2015-02-10	0.92	2.65046
2015-10-21	1	20.1945	21.962	5.97094	8.34	6.17	28.29	11.1	5.17	2.81	0.78	0.18		2015-02-11	1.69	3.7963
2015-10-29	1	7.38745	15.08	20.5469	4.45	6.03	29.92	10.39	6.4	3	1.86	0.28		2015-02-12	2.91	3.96991
2015-11-04	1	5.55264	16.98	15.715	5.08	6.39	28.5	9.98	5.46	3.96	2.83	0.31		2015-02-13	1.89	5.6713
2015-11-10	1	6.34557	12.8288	1.11382	8.84	7	29.35	9.76	7.23	1.74	1.79	0.29		2015-02-14	3.38	2.89352
2015-11-18	1	4.49011	7.49294	4.35019	15.3	6.68	29.77	8.48	8.08	1.06	1.09	0.18		2015-02-15	0.36	5.79861
2015-11-25	1	2.40334	3.29812	1.9686	5.79	6.74	26.13	7.56	3.35	3.72	2.97	0.25		2015-02-16	1.78	9.53704
2015-12-02	1	3.6046	3.19772	21.501	2.33	6.89	27.43	6.02	1.29	5.42	3.16	0.29		2015-02-17	3.1	4.22454
2015-12-09	1	5.23552	5.70803	26.218	2.71	6.23	29.35	7.41	2.49	5.13	3.32	0.36		2015-02-18	1.39	1.71296
2015-12-16	1	4.12722	6.3539	23.4805	2.17	6.25	29.31	6.94	3	4.84	4.25	0.4		2015-02-19	1.15	2.78935
2016-01-06	1	3.99129	4.22219	7.55789	1.9	6.55	29.68	4.68	2.25	NaN	NaN	NaN		2015-02-20	3.39	10.1273
2016-01-14	1	2.95975	2.16342	6.12052	1.96	7.13	28.03	3.35	2.71	4.68	6.59	0.25		2015-02-21	3.93	5.8912
2016-01-20	1	3.12957	2.59166	6.38647	2.23	6.85	29.58	3.51	1.44	NaN	NaN	NaN		2015-02-22	0.65	5.71759
2016-01-27	1	NaN	NaN	NaN	1.91	6.92	30.15	3.4	2.07	2.5	6.82	0.2		2015-02-23	1.36	5.56713
2016-02-04	1	2.47741	2.39619	12.4891	1.96	7.16	29.61	3.46	1.86	NaN	NaN	NaN		2015-02-24	4.07	6.00694
2016-02-10	1	3.39983	1.7652	9.37144	1.21	7.4	28.11	2	1.61	4.15	8.08	0.24		2015-02-25	0.71	8.0787
2016-02-17	1	2.48164	2.01872	11.5659	1.18	7.33	29.64	2.45	1.16	NaN	NaN	NaN		2015-02-26	0.96	3.59954
2016-02-24	1	1.5276	1.60027	12.1124	1.9	8.19	27.45	1.33	1.79	4.97	7.1	0.26		2015-02-27	4.28	4.53704
2016-03-02	1	2.03277	1.75733	9.39666	4.14	7.61	28.52	3.15	1.87	NaN	NaN	NaN		2015-02-28	4.39	2.21065
2016-03-09	1	1.88961	1.70185	9.58514	18.55	8.55	28.3	2.21	8.01	3.62	2.88	0.25		2015-03-01	3.85	2.99769
2016-03-16	1	2.38162	1.79215	10.4825	29.02	8.75	29.7	2.79	12.73	NaN	NaN	NaN		2015-03-02	0.91	4.91898
2016-03-23	1	NaN	NaN	NaN	NaN	NaN	NaN	NaN	NaN	NaN	NaN	NaN		2015-03-03	4.38	7.44213
2016-03-31	1	1.88116	1.64	10.2582	7.37	8.26	29.13	3.11	4.98	0.47	-0.07	0.01		2015-03-04	2.53	5.50926
2016-04-06	1	2.41045	1.70672	10.5309	6.56	7.93	27.72	2.52	0.59	NaN	NaN	NaN		2015-03-05	1.23	4.94213
2016-04-13	1	2.16086	1.3037	10.0646	11	8.14	27.65	4.85	8.02	1.34	0.46	0.04		2015-03-06	4.61	4.12037
2016-04-20	1	2.67156	1.77033	10.3796	3.94	NaN	29.07	4.64	1.8	NaN	NaN	NaN		2015-03-07	3.21	4.53704
2016-04-28	1	3.49054	3.9048	9.57412	2.07	7.99	29.5	5.19	1.69	2.96	1.1	0.07		2015-03-08	4.34	2.69676
2016-05-04	1	3.65212	9.552	12.4432	3.27	7.77	29.59	6.36	2.88	NaN	NaN	NaN		2015-03-09	2.71	2.60417
2016-05-11	1	5.2302	NaN	NaN	3.85	7.98	28.71	7.28	2.21	0.3	0.3	-0.01		2015-03-10	4.37	3.56481
2016-05-18	1	5.99852	73.5759	129.429	5.81	7.52	29.23	7.73	1.33	NaN	NaN	NaN		2015-03-11	1.87	5.70602
2016-05-25	1	4.63375	48.5694	22.269	1.39	6.43	29.44	9.79	0.95	0.87	0.41	0.02		2015-03-12	3.69	5.9375
2016-06-01	1	3.83975	19.9841	0.45404	2.64	6.8	29.79	9.37	1.1	NaN	NaN	NaN		2015-03-13	5.1	6.58565
2016-06-07	1	5.95272	10.5854	11.5889	6.98	6.9	29.42	11.75	2.45	3.52	0.46	0		2015-03-14	4.38	2.87037
2016-06-15	1	6.26893	32.0757	55.9369	5.25	7.31	29.41	10.73	3.46	NaN	NaN	NaN		2015-03-15	0.96	5.91435
2016-06-22	1	7.61068	60.2325	71.8452	2.68	5.79	30.38	11.29	2.13	1.06	0.01	0		2015-03-16	1.91	7.40741
2016-06-29	1	5.41346	44.9433	6.5302	2.14	6.51	30.01	15.41	3.58	NaN	NaN	NaN		2015-03-17	3.76	3.53009
2016-07-06	1	7.97811	48.1153	2.78856	4.45	6.57	30.25	14.88	3.6	0.79	0.18	-0.01		2015-03-18	1.13	8.64583
2016-07-13	1	4.69297	38.092	1.63059	4.22	6.83	29.9	14.32	1.99	NaN	NaN	NaN		2015-03-19	4.85	7.33796
2016-07-20	1	8.46493	18.9827	0.47879	4.47	6.46	29.97	17.95	4.16	0.72	0.16	-0.01		2015-03-20	5.43	3.0787
2016-07-27	1	8.68126	24.7405	4.19973	6.81	6.42	30.06	17.98	4.93	NaN	NaN	NaN		2015-03-21	2.56	1.93287
2016-08-03	1	11.1189	24.5084	2.36994	5.22	6.86	30.18	18.8	2.75	1.6	0.32	-0.02		2015-03-22	1.78	9.29398
2016-08-10	1	14.4975	40.9328	3.56447	1.8	6.01	30.49	17.62	2.17	NaN	NaN	NaN		2015-03-23	3.59	7.68519
2016-08-18	1	22.4451	42.2915	34.9918	3.83	6.13	30.18	17.11	6.18	2.21	0.02	0.01		2015-03-24	5.49	1.57407
2016-08-24	1	40.81	95.5231	0.640029	3	6.22	30.26	18.41	4.7	NaN	NaN	NaN		2015-03-25	5.77	1.73611
2016-08-31	1	31.3161	85.2738	0.788585	3.93	6.62	30.31	18.32	3.71	0.43	-0.11	0.01		2015-03-26	0.85	3.61111
2016-09-07	1	14.2381	25.4038	0.439955	3.58	6.54	30.54	16.21	3.33	NaN	NaN	NaN		2015-03-27	1.1	1.55093
2016-09-14	1	12.1726	10.9308	1.60573	3.56	6.23	30.38	18.05	2.75	2.31	-0.12	0.01		2015-03-28	0.52	3.14815
2016-09-21	1	9.39001	7.95877	0.821958	2.69	6.3	29.91	17.96	15.85	NaN	NaN	NaN		2015-03-29	5.74	4.20139
2016-09-28	1	8.46853	9.44206	2.87099	5.78	6.08	30.47	13.14	16.81	1.5	-0.1	0.02		2015-03-30	5.66	3.4375
2016-10-05	1	7.93105	11.813	6.42383	7.84	6.27	30.14	14.21	17.46	NaN	NaN	NaN		2015-03-31	4.39	4.44444
2016-10-12	1	7.10097	15.0108	6.09686	28.7	6.71	29.53	14.05	24.55	0.7	-0.49	0.02		2015-04-01	5.68	4.21296
2016-10-19	1	7.00467	14.4755	9.00113	21.56	6.84	29.38	14.15	15.82	NaN	NaN	NaN		2015-04-02	5.69	5.23148
2016-10-26	1	4.25579	7.7765	1.36548	9.18	6.18	28.08	12.14	4.46	2.93	0.25	0.06		2015-04-03	3.26	2.32639
2016-11-02	1	4.33108	6.17107	1.37081	6.38	5.78	28.42	10.37	4.7	NaN	NaN	NaN		2015-04-04	1.15	5.74074
2016-11-09	1	4.12726	5.45655	0.765698	9.67	7.65	28.98	8.48	6.88	0.67	0.33	0.14		2015-04-05	6.01	6.97917
2016-11-16	1	3.03128	4.45872	1.40714	7.95	6.33	29.53	9.04	2.73	NaN	NaN	NaN		2015-04-06	5.32	3.3912
2016-11-23	1	2.90943	3.33162	0.703301	2.68	6.16	28.45	8.51	1.59	4.57	6.03	0.49		2015-04-07	2.28	2.37269
2016-11-30	1	3.50818	3.35065	1.34264	1.93	5.99	29.46	8.11	1.62	NaN	NaN	NaN		2015-04-08	5.96	2.99769
2016-12-07	1	2.87734	3.57419	2.06305	1.67	6.57	28.58	6.3	1.91	5.31	6.65	0.5		2015-04-09	5.38	3.68056
2016-12-14	1	3.19537	3.18768	1.52639	1.74	6.28	29.32	5.99	1.12	NaN	NaN	NaN		2015-04-10	1.42	5.42824
2016-12-21	1	2.28529	3.0149	0.52884	1.64	6.78	28.45	3.62	1.23	6.73	8.95	0.41		2015-04-11	4.47	6.6088
2017-01-04	1	3.47166	3.88092	4.01148	1.18	6.7785	28.9676	4.2265	0.8676	NaN	NaN	NaN		2015-04-12	6.31	3.98148
2017-01-11	1	1.78531	3.60045	3.99234	0.79	6.9196	29.3269	3.2487	0.5867	4.35	8.32	0.34		2015-04-13	6.39	2.19907
2017-01-18	1	1.62211	2.67126	3.11846	0.27	7.3732	28.7405	1.8016	0.6057	NaN	NaN	NaN		2015-04-14	0.93	4.13194
2017-01-25	1	1.39898	2.17773	2.94962	0.71	7.2035	29.282	2.784	0.7649	3.79	8.26	0.42		2015-04-15	6.73	3.24074
2017-02-01	1	1.23123	2.43476	1.49333	0.78	7.0068	28.5102	2.89	0.8728	NaN	NaN	NaN		2015-04-16	6.84	3.41435
2017-02-08	1	1.44129	2.44719	1.56773	0.72	7.0199	30.1913	2.3139	0.7273	4.32	8.12	0.26		2015-04-17	3.54	3.58796
2017-02-15	1	2.86234	2.58251	3.16686	0.31	6.968	30.252	1.8867	0.5593	NaN	NaN	NaN		2015-04-18	6.86	3.02083
2017-02-22	1	1.77824	1.93938	0.862156	0.34	6.809	30.1155	1.7053	0.1361	5.78	9.26	0.25		2015-04-19	6.9	3.125
2017-03-01	1	3.35411	1.97311	2.4961	4.85	7.1931	26.1653	3.0969	0.1298	NaN	NaN	NaN		2015-04-20	6.52	3.58796
2017-03-08	1	2.29014	3.06312	5.53376	2.63	7.4736	29.9004	1.5978	1.9616	4.35	8.22	0.17		2015-04-21	1.06	9.14352
2017-03-15	1	2.45562	2.75726	3.54286	NaN	7.6031	30.156	1.2067	2.664	NaN	NaN	NaN		2015-04-22	4.6	3.05556
2017-03-22	1	2.12537	3.38661	2.14196	4.86	7.7494	29.9356	2.0249	1.2101	1.96	7.17	0.18		2015-04-23	1.88	4.24769
2017-03-29	1	2.61053	4.41232	1.30358	9.91	8.4747	29.8081	1.1102	8.145	NaN	NaN	NaN		2015-04-24	3.72	2.06019
2017-04-05	1	2.07229	2.95255	0.760631	21.58	8.5384	30.2539	1.4761	10.311	0.69	1.39	0.09		2015-04-25	5.81	1.66667
2017-04-12	1	1.92263	1.87435	1.17258	6.29	9.909	26.812	5.2307	2.186	NaN	NaN	NaN		2015-04-26	5.38	2.1875
2017-04-20	1	2.22357	1.76649	0.991393	NaN	8.489	28.9268	4.0877	1.5849	2.23	0.16	0		2015-04-27	1.98	3.24074
2017-04-26	1	2.1584	1.88767	1.67986	3.21	8.2594	29.1433	4.989	2.912	NaN	NaN	NaN		2015-04-28	2.86	4.59491
2017-05-03	1	2.37255	2.53398	2.06209	6	7.9631	27.8839	5.9453	3.6956	3.48	0.35	0.08		2015-04-29	5.71	4.88426
2017-05-10	1	2.88312	3.15957	3.78645	1.8	7.7852	26.3652	8.1315	1.551	NaN	NaN	NaN		2015-04-30	3.08	4.08565
2017-05-17	1	2.77347	3.64944	1.94536	1.98	7.8278	23.7509	8.6243	0.7497	1.93	1.55	0.07		2015-05-01	5.22	3.13657
2017-05-24	1	3.17516	2.99402	1.73285	2.01	7.6512	29.0248	6.6424	0.7792	NaN	NaN	NaN		2015-05-02	4.9	2.8588
2017-05-31	1	4.16132	2.43344	0.710342	8.09	8.3243	27.6029	9.5737	2.7189	1.13	-0.02	-0.02		2015-05-03	6.73	1.58565
2017-06-07	1	7.60369	3.89636	2.90784	4.05	7.6199	28.773	9.6124	1.2608	NaN	NaN	NaN		2015-05-04	7.32	3.51852
2017-06-14	1	8.99369	13.1042	13.5308	2.8	7.0738	28.6412	11.9257	0.7687	4.29	0.28	0.01		2015-05-05	6.9	4.72222
2017-06-20	1	4.85989	17.8479	21.1195	3.32	7.0483	29.1636	12.791	1.7243	NaN	NaN	NaN		2015-05-06	7.56	5.8912
2017-06-28	1	7.15776	63.916	88.7105	2.13	6.235	29.5429	13.7064	1.1301	0.77	-0.16	-0.03		2015-05-07	7.42	4.91898
2017-07-05	1	4.50025	101.479	4.89528	4.12	6.4766	28.7678	15.0839	2.2177	NaN	NaN	NaN		2015-05-08	5.09	2.39583
2017-07-12	1	5.94663	50.7778	81.3558	1.91	6.1752	28.0764	16.1457	1.9818	4.33	1.12	0.04		2015-05-09	6.31	3.7037
2017-07-19	1	6.05582	37.5765	6.26567	2.57	6.7619	29.123	15.6914	2.8926	NaN	NaN	NaN		2015-05-10	5.21	2.66204
2017-07-26	1	7.05453	44.3049	11.7759	8.19	6.8175	29.3493	14.1675	3.7075	2.4	0.54	0.01		2015-05-11	3.08	2.5463
2017-08-02	1	13.099	33.5953	8.16018	4.74	6.8781	30.0122	17.2015	2.5288	NaN	NaN	NaN		2015-05-12	2.62	4.23611
2017-08-09	1	11.0629	13.6507	1.52209	6.3	5.9632	29.8498	18.7217	4.9935	2.31	-0.02	-0.03		2015-05-13	3.34	4.29398
2017-08-16	1	13.7302	19.6606	3.47207	5.39	6.7263	30.0097	19.6961	4.1642	NaN	NaN	NaN		2015-05-14	7.86	2.95139
2017-08-23	1	17.0706	23.0499	28.1421	5.75887	6.2078	30.2066	14.9355	7.2842	2.33	0.04	0.01		2015-05-15	7.84	1.71296
2017-08-30	1	9.15141	21.9876	4.29334	5.98036	6.5514	29.8744	15.5341	6.799	NaN	NaN	NaN		2015-05-16	7.8	2.37269
2017-09-06	1	10.0733	15.7744	5.27256	6.94688	6.1929	30.2525	14.7046	5.0141	2.37	0.2	0.04		2015-05-17	2.45	2.78935
2017-09-13	1	16.5234	40.6212	6.29549	0.898469	5.82	30.2075	14.3186	1.9112	NaN	NaN	NaN		2015-05-18	8.03	2.5
2017-09-20	1	22.1132	56.3786	35.5719	2.41631	5.5908	30.4577	16.2087	5.2488	2.49	-0.1	-0.01		2015-05-19	7.28	3.0787
2017-09-27	1	20.5452	54.4506	20.7958	6.56328	6.9465	30.1204	18.3954	7.7382	NaN	NaN	NaN		2015-05-20	1.9	3.53009
2017-10-04	1	13.2498	36.1664	3.02884	9.74934	6.2251	29.7116	15.76	5.8273	0.62	0	-0.01		2015-05-21	7.58	5.68287
2017-10-11	1	8.53102	20.8125	6.8008	22.3508	6.4067	29.6099	16.485	19.1105	NaN	NaN	NaN		2015-05-22	1.28	2.38426
2017-10-18	1	8.59361	16.4154	4.12581	4.69166	5.6153	30.0945	14.2565	8.0082	1.81	0.57	0.11		2015-05-23	5.2	5.97222
2017-10-25	1	10.8858	15.8961	13.5173	4.9937	6.3785	30.3732	13.8715	8.8692	NaN	NaN	NaN		2015-05-24	6.01	4.86111
2017-11-01	1	19.0515	28.791	17.1929	0.777399	5.0489	29.9479	13.5773	6.9226	3.73	0.78	0.08		2015-05-25	7.73	3.62269
2017-11-08	1	24.7681	25.5465	15.5261	0.923957	5.4887	30.2539	13.0321	5.0513	NaN	NaN	NaN		2015-05-26	2.31	4.25121
2017-11-15	1	20.574	30.8993	18.0675	1.1661	5.5585	30.2265	11.3295	2.9287	7.71	2.59	0.22		2015-05-27	7.06	2.82828
2017-11-22	1	9.43988	28.8612	35.0754	0.998705	6.082	29.6593	9.8834	3.5872	NaN	NaN	NaN		2015-05-28	6.12	3.71528
2017-11-28	1	7.6106	33.6222	71.3828	0.0411334	6.1314	29.0741	8.7763	2.1391	NaN	NaN	NaN		2015-05-29	5.76	2.89352
2017-12-06	1	5.20601	21.8578	73.0442	0.128106	5.7684	29.9505	8.5475	3.0146	NaN	NaN	NaN		2015-05-30	6.16	3.32176
2017-12-13	1	2.91361	13.7647	41.6373	0.315591	6.857	25.3962	6.6103	1.3137	NaN	NaN	NaN		2015-05-31	3.62	3.58796
2017-12-20	1	3.50216	10.8664	25.2442	NaN	6.41	27.2089	5.5245	1.0362	NaN	NaN	NaN		2015-06-01	1.86	1.93237
2015-01-07	5	NaN	NaN	NaN	1.52045	6.7396	29.8434	3.6179	1.0143	1.97	8.66	0.3		2015-06-02	1.79	2.97454
2015-01-14	5	NaN	NaN	NaN	1.59647	NaN	30.09	3.6937	1.2179	2.7	8.78	0.29		2015-06-03	3.21	4.13194
2015-01-21	5	NaN	NaN	NaN	3.87038	6.3554	30.2246	3.6353	1.4737	2.1	6.99	0.26		2015-06-04	7.57	3.28704
2015-01-29	5	NaN	NaN	NaN	3.87038	6.6569	29.5652	2.8491	1.4005	2.83	6.48	0.27		2015-06-05	7.69	3.44907
2015-02-04	5	NaN	NaN	NaN	1.57958	7.0997	29.6571	1.3198	1.2223	2.72	6.14	0.24		2015-06-06	1.16	2.71739
2015-02-11	5	NaN	NaN	NaN	3.63015	6.9476	29.5839	0.1792	1.821	3.14	5.31	0.25		2015-06-07	8.37	3.66898
2015-02-19	5	NaN	NaN	NaN	2.58915	7.5494	29.7776	-0.1536	1.6381	3.02	4.76	0.2		2015-06-08	8.19	4.28241
2015-02-25	5	NaN	NaN	NaN	3.20308	7.6929	29.6873	-0.3462	1.936	3.56	5.43	0.22		2015-06-09	6.3	6.25
2015-03-04	5	NaN	NaN	NaN	4.48431	7.9366	29.8003	-0.0008	2.8674	2.87	6.71	0.21		2015-06-10	2.35	4.97685
2015-03-11	5	NaN	NaN	NaN	8.44693	8.0118	30.105	1.0266	5.9784	1.07	5.9	0.2		2015-06-11	5.9	3.65741
2015-03-17	5	NaN	NaN	NaN	11.9102	7.826	30.4518	0.6956	5.2259	0.71	5.77	0.19		2015-06-12	6.23	4.72222
2015-03-25	5	NaN	NaN	NaN	10.2208	8.6187	30.4071	0.5544	13.006	0.4	0.75	0.17		2015-06-13	7.35	4.23611
2015-04-01	5	NaN	NaN	NaN	9.29163	9.5252	30.0447	1.1919	12.8683	0.45	0	0.1		2015-06-14	7.42	4.14352
2015-04-08	5	NaN	NaN	NaN	4.59108	10.1187	29.5825	1.4069	6.9097	0.59	0	0.09		2015-06-15	8.39	2.56944
2015-04-15	5	NaN	NaN	NaN	5.01815	8.9109	29.8013	1.5071	4.4027	0.75	0.07	0.1		2015-06-16	4.62	4.62963
2015-04-20	5	NaN	NaN	NaN	5.65877	8.6339	30.0443	1.1817	4.4557	0.46	0	0.09		2015-06-17	8.28	3.92361
2015-04-29	5	NaN	NaN	NaN	6.43285	8.1689	29.7607	1.4555	2.6255	1.71	0.39	0.12		2015-06-18	8.02	3.00926
2015-05-06	5	NaN	NaN	NaN	2.42427	8.2349	29.0062	3.1539	2.3893	1.11	0.37	0.12		2015-06-19	NaN	2.48843
2015-05-13	5	NaN	NaN	NaN	0.776746	7.5014	29.7344	2.8196	1.2723	4.78	1.28	0.12		2015-06-20	8.08	3.03241
2015-05-20	5	NaN	NaN	NaN	3.52338	7.335	29.4108	5.6507	5.9219	2.51	1.61	0.17		2015-06-21	2.04	3.81944
2015-05-27	5	4.5919	1.96901	2.1646	0.96	7.27	30.21	3.43	2.03	4.46	1.81	0.17		2015-06-22	4.41	6.67824
2015-06-03	5	6.84225	20.0234	42.0007	3.47	7.02	30.13	3.9	2.88	2.9	1.56	0.17		2015-06-23	6.09	3.66898
2015-06-10	5	4.25331	9.42048	8.70678	3.6	7.85	29.21	7.97	4.76	0.44	0	0.1		2015-06-24	7.17	4.66435
2015-06-17	5	7.93166	5.22085	5.46934	2.8	7.3	29.5	8.31	3.74	1.76	0.54	0.15		2015-06-25	8.22	4.1088
2015-06-24	5	7.78383	2.5832	5.56166	6.94	7.03	29.09	9.94	11.56	0.29	0	0.11		2015-06-26	7.32	2.56944
2015-06-30	5	15.817	2.27091	4.11585	5.63	6.95	29.1	10.74	17.2	1.08	0	0.15		2015-06-27	7.96	2.56944
2015-07-08	5	10.8848	1.76472	1.44341	5.39	6.36	29.33	10.34	NaN	0.43	0	0.1		2015-06-28	1.79	5.61343
2015-07-15	5	15.863	4.37502	37.1452	4.11	6.01	29.67	10.04	5.36	0.77	0	0.12		2015-06-29	6.4	5.42824
2015-07-22	5	19.3517	125.464	150.1	3.47	6.06	29.58	13.61	6.64	2.41	0.05	0.15		2015-06-30	4.62	2.78935
2015-07-29	5	20.4754	53.8319	42.957	4.3	6.02	29.4	16.28	6.16	1.72	0.09	0.13		2015-07-01	7.31	3.06713
2015-08-05	5	29.2234	41.5216	71.0042	5.7	5.11	29.68	13.5	13.54	0.44	0	0.06		2015-07-02	6.59	4.4213
2015-08-12	5	8.55531	23.4869	48.6511	4.7	6.58	29.76	13.2	6.93	0.5	0	0.08		2015-07-03	7.95	2.93981
2015-08-19	5	NaN	NaN	NaN	2.54	6.55	29.88	14.66	3.91	0.63	0	0.08		2015-07-04	7.24	2.39583
2015-08-26	5	22.8129	45.4508	48.5973	4.34	6.45	29.42	18.24	5.48	0.53	0	0.11		2015-07-05	6.51	1.95602
2015-09-02	5	44.0888	55.3142	68.6158	5.03	5.12	29.64	16.89	6.66	0.49	0	0.09		2015-07-06	7.89	1.36574
2015-09-09	5	37.2672	67.4311	252.983	5.84	5.67	30.22	13.34	7.44	0.64	0	0		2015-07-07	7.82	3.18287
2015-09-17	5	17.5007	64.6327	23.5493	8.84	6.03	29.94	14.29	9.05	0.63	0	0		2015-07-08	4.57	3.80787
2015-09-23	5	13.7909	30.988	37.1995	8.39	6.06	30.21	12.14	11.58	0.73	0.26	0.14		2015-07-09	7.37	1.89815
2015-09-30	5	14.636	62.4085	69.4309	7.73	6.31	30.12	14.65	6.6	0.69	0	0		2015-07-10	7.07	2.92824
2015-10-07	5	12.0694	48.203	48.6516	NaN	5.67	29.55	13.48	4.91	1.62	0.35	0.13		2015-07-11	7.39	2.24537
2015-10-15	5	8.3736	40.6459	35.0505	10.11	5.76	29.42	13.54	6.56	0.76	0	0.1		2015-07-12	5.42	3.85417
2015-10-21	5	31.6682	23.8598	8.66622	6.96	5.58	29.43	11.97	7.14	2.91	0.65	0.15		2015-07-13	7.82	1.88657
2015-10-29	5	37.5374	13.9892	18.7031	3.71	6.01	29.95	10.36	6.55	3.04	2	0.28		2015-07-14	7.65	3.83102
2015-11-04	5	7.4688	17.1875	32.6816	7.62	5.57	29.86	10.48	5.28	4.19	2.32	0.29		2015-07-15	4.35	2.87037
2015-11-10	5	4.82813	12.5138	2.99165	14.28	6.15	29.84	9.66	13.75	0.91	1.71	0.26		2015-07-16	7.93	3.3912
2015-11-18	5	4.53206	7.42068	4.02305	14.23	6.69	29.77	8.49	9.67	0.85	1.07	0.15		2015-07-17	7.94	2.75463
2015-11-25	5	3.07778	3.85756	2.80166	5.69	6.23	29.47	8.88	3.73	3.73	2.52	0.24		2015-07-18	3.15	1.45833
2015-12-02	5	4.3739	3.7452	37.3977	1.85	5.64	29.49	8.7	1.92	4.88	2.67	0.28		2015-07-19	1.38	3.68056
2015-12-09	5	5.11341	5.69115	30.6745	2.91	5.96	29.52	7.66	3.37	4.83	3.15	0.31		2015-07-20	2.47	2.1875
2015-12-16	5	4.37051	5.60696	20.4483	2.43	5.98	29.78	7.29	3.36	4.38	4.24	0.37		2015-07-21	2.37	3.66898
2016-01-06	5	3.93134	4.31036	5.58007	2.43	6.53	29.73	4.89	3.61	3.43	6.35	0.26		2015-07-22	2.41	3.42593
2016-01-14	5	2.93968	2.50384	5.92252	2.86	6.76	29.39	4.59	4.52	3.33	6.53	0.24		2015-07-23	6.4	3.57639
2016-01-20	5	3.08039	2.93904	4.93619	2.01	6.62	29.7	3.79	3.21	2.9	6.3	0.21		2015-07-24	6.18	2.55787
2016-01-27	5	NaN	NaN	NaN	2.22	6.92	30.15	3.4	2.2	2.45	7.28	0.19		2015-07-25	2.96	2.5463
2016-02-04	5	2.26328	2.38241	13.7205	1.88	7.02	29.81	3.51	1.92	3.31	7.36	0.23		2015-07-26	4.22	4.0625
2016-02-10	5	3.37928	1.80102	10.9645	1.34	6.97	29.33	2.77	1.33	3.35	7.29	0.23		2015-07-27	2.34	3.81944
2016-02-17	5	2.40269	2.12633	11.6099	1.42	7.31	29.67	2.47	1.31	3.53	6.67	0.24		2015-07-28	2.17	2.80093
2016-02-24	5	1.95973	1.84069	11.7742	2.92	7.27	29.63	2.55	1.9	6.6	6.51	0.26		2015-07-29	5.71	2.33796
2016-03-02	5	2.17061	1.70906	10.3647	4.69	7.44	28.7	3.14	2.95	5.79	6.31	0.26		2015-07-30	7.45	2.77778
2016-03-09	5	2.55621	1.64324	9.1329	15.71	7.48	29.48	2.74	11.7	0.89	4.26	0.23		2015-07-31	4.65	4.71065
2016-03-16	5	2.35606	1.73005	11.1796	24.85	8.6	29.84	2.78	15.69	1.1	0	0		2015-08-01	7.36	3.54167
2016-03-31	5	1.99856	1.50101	10.1964	7.45	8.25	29.15	3.07	5.28	0.73	0	0.02		2015-08-02	7.29	3.34491
2016-04-06	5	2.73356	1.7619	11.0823	10.42	7.74	29.29	3.07	2.31	0.49	0.42	0.05		2015-08-03	6.74	3.26389
2016-04-13	5	2.08903	1.33505	12.1249	12.33	7.82	29.52	4.28	10.53	1.31	0.03	0.01		2015-08-04	4.56	4.46759
2016-04-20	5	2.52668	1.6979	11.3438	3.43	8.38	29.08	4.6	3.22	1.1	0	0.01		2015-08-05	4.39	4.08565
2016-04-28	5	3.6238	3.5962	10.9956	2.35	7.84	29.58	5.09	2.44	2.48	0.52	0.01		2015-08-06	7.08	4.35185
2016-05-04	5	4.26609	7.71065	12.9138	3.83	7.46	29.92	5.49	4.87	0.79	0.4	0		2015-08-07	7.22	3.11343
2016-05-11	5	5.59449	NaN	NaN	5.49	7.46	29.75	5.69	6.64	0.84	0.32	0		2015-08-08	2.48	2.19907
2016-05-18	5	7.2945	65.6614	193.604	8.52	7	29.6	6.62	4.19	0.74	0.27	0.01		2015-08-09	1.09	2.03704
2016-05-25	5	5.54771	33.8852	36.7468	3.74	7.52	30.24	6.21	1.39	1.11	0.92	0.05		2015-08-10	5.36	4.3287
2016-06-01	5	4.91511	17.1301	7.1236	3.91	6.94	30.04	7.79	2.41	2.16	0.95	0.07		2015-08-11	7.04	3.54167
2016-06-07	5	7.72858	10.0165	7.67993	6.27	7.11	29.83	9.91	4.45	2.31	0.74	0.04		2015-08-12	3	4.79167
2016-06-15	5	6.96768	21.9827	59.5662	7.13	6.81	29.66	9.79	6.49	NaN	NaN	NaN		2015-08-13	4.39	2.59259
2016-06-22	5	7.0061	45.767	114.916	5.08	6.88	30.14	10.72	3.7	0.6	0	0.02		2015-08-14	6.54	2.95139
2016-06-29	5	7.10303	51.8021	18.2861	1.88	6.68	30.36	12.44	3.07	NaN	NaN	NaN		2015-08-15	6.58	2.59259
2016-07-06	5	8.37282	68.8688	21.8207	3.57	6.82	30.38	12.8	3.91	3.18	0.22	0		2015-08-16	6.16	1.95602
2016-07-13	5	6.00188	39.7612	10.1961	3.81	6.56	30.28	11.76	4.4	NaN	NaN	NaN		2015-08-17	6.35	2.26852
2016-07-20	5	9.22889	31.1235	35.8343	3.86	6.29	30.28	14.23	4.99	0.61	0.09	-0.02		2015-08-18	5.57	2.70833
2016-07-27	5	9.48015	35.8605	35.2331	2.95	5.81	30.4	12.48	3.96	NaN	NaN	NaN		2015-08-19	5.32	2.28009
2016-08-03	5	11.3892	30.7067	25.9494	4.57	5.99	30.56	11.91	5.78	2.01	0.26	-0.02		2015-08-20	4.95	2.83565
2016-08-10	5	13.6776	38.0657	30.7276	2.89	5.8	30.55	14.85	4.34	NaN	NaN	NaN		2015-08-21	4.89	4.58333
2016-08-18	5	26.6532	42.8294	35.5905	4.18	6.04	30.2	17.03	7.8	1.01	0	0.02		2015-08-22	4.11	3.57488
2016-08-24	5	42.9658	115.264	11.9545	5.15	6.02	30.27	18.23	7.81	NaN	NaN	NaN		2015-08-23	3.05	2.48843
2016-08-31	5	33.6569	87.0847	5.60195	5.66	5.42	30.34	17.08	6.72	0.73	0	0.02		2015-08-24	3.04	2.37269
2016-09-07	5	14.3012	25.2202	3.22961	4.89	7.01	30.58	14.92	6.49	NaN	NaN	NaN		2015-08-25	5.86	3.04398
2016-09-14	5	12.3674	12.5924	1.07312	2.4	6.21	30.38	18.05	4.22	2.09	0.22	0		2015-08-26	1.83	5.8912
2016-09-21	5	11.2908	9.8073	1.18791	4.76	6.07	30.56	14.27	19.14	NaN	NaN	NaN		2015-08-27	2.64	5.27778
2016-09-28	5	8.94872	9.53475	3.29154	5.95	6.02	30.5	13.12	16.99	0.89	0.04	0.01		2015-08-28	6.38	3.41435
2016-10-05	5	8.31045	11.5337	11.8492	8.66	6.24	30.14	14.2	18.41	NaN	NaN	NaN		2015-08-29	6.12	2.09491
2016-10-12	5	7.1161	15.5546	7.41448	33.09	6.26	29.61	14.08	24.55	2.47	0	0.01		2015-08-30	4.53	3.06713
2016-10-19	5	7.6421	15.3636	8.96585	20.61	6.52	29.4	14.11	19.62	NaN	NaN	NaN		2015-08-31	5.68	4.02778
2016-10-26	5	6.19284	11.2486	3.49752	5.04	5.38	29.33	13.9	5.48	1.66	0	0.04		2015-09-01	5.87	4.88426
2016-11-02	5	7.02292	7.67437	1.76953	7.15	5.22	29.42	10.17	5.75	NaN	NaN	NaN		2015-09-02	5.43	1.85185
2016-11-09	5	4.89319	5.65287	2.05849	12.6	6.25	29.39	9.22	13.71	1.29	0.55	0.14		2015-09-03	5.1	2.56944
2016-11-16	5	3.68552	5.50983	2.00644	4.58	6.04	29.7	9.06	2.71	NaN	NaN	NaN		2015-09-04	6.02	2.30324
2016-11-23	5	3.61684	3.90166	1.15374	4.23	5.88	29.63	9.12	2.49	3.25	5.78	0.5		2015-09-05	6.02	1.5162
2016-11-30	5	3.03352	3.66555	1.28584	1.52	5.95	29.56	8.16	1.76	NaN	NaN	NaN		2015-09-06	5.96	1.75926
2016-12-07	5	2.92489	3.62263	1.4915	2.54	6.2	29.16	7.17	1.97	4.19	6.08	0.48		2015-09-07	5.74	3.91204
2016-12-14	5	3.58559	3.33482	1.4028	1.12	6.29	29.35	5.99	0.96	NaN	NaN	NaN		2015-09-08	3.02	1.89815
2016-12-21	5	2.89797	3.35407	2.3777	0.76	6.35	29.35	5.07	0.84	4.13	6.68	0.4		2015-09-09	2.12	2.95139
2017-01-04	5	3.57203	3.11779	2.69598	1.19	6.7275	29.0215	4.2561	0.907	NaN	NaN	NaN		2015-09-10	2.8	2.5463
2017-01-11	5	2.81568	3.2528	1.43897	0.64	6.9119	29.3506	3.2731	0.6112	NaN	NaN	NaN		2015-09-11	4.21	4.49074
2017-01-18	5	2.06353	2.77908	1.26665	0.36	6.9168	29.4126	3.2159	0.5527	4.07	7.84	0.33		2015-09-12	3.1	3.40278
2017-01-25	5	1.43727	2.33089	1.29123	0.44	6.5166	29.9788	3.6718	0.5112	NaN	NaN	NaN		2015-09-13	1.42	2.08333
2017-02-01	5	1.24625	2.65227	2.01049	0.42	6.6241	29.958	3.2864	0.6339	2.98	8.16	0.41		2015-09-14	2.56	4.62963
2017-02-08	5	1.71965	2.27044	1.39188	0.68	7.0316	30.1829	2.3063	0.7601	NaN	NaN	NaN		2015-09-15	3.83	3.84259
2017-02-15	5	2.00105	2.56587	2.14086	0.43	7.0221	30.336	1.8319	0.7773	3.56	7.79	0.25		2015-09-16	5.16	3.85417
2017-02-22	5	1.6453	2.24194	0.536258	1.15	7.0257	30.2697	1.8204	0.5215	NaN	NaN	NaN		2015-09-17	5.29	1.9213
2017-03-01	5	5.80491	1.97522	5.49359	3.64	7.2844	29.3392	2.3553	5.6581	4.41	8.97	0.23		2015-09-18	5.13	2.41898
2017-03-08	5	2.01274	2.61378	3.37378	2.71	7.4514	29.9214	1.5788	2.1072	NaN	NaN	NaN		2015-09-19	3.25	3.09028
2017-03-15	5	2.08889	2.45668	2.47591	NaN	7.6032	30.1616	1.2043	3.0189	3.28	8.19	0.16		2015-09-20	3.49	5.56713
2017-03-22	5	1.89207	4.39986	2.17668	5.88	7.7182	29.9839	1.8769	2.0526	2.19	5.73	0.19		2015-09-21	5.32	2.8588
2017-03-29	5	2.38952	4.37307	1.75812	9.87	8.2452	30.1264	1.2202	8.7736	1.21	3.08	0.15		2015-09-22	4.08	1.57407
2017-04-05	5	1.93417	3.00832	0.675125	19.84	8.5246	30.2542	1.4745	12.9563	1.81	1.29	0.09		2015-09-23	5.15	1.70139
2017-04-12	5	2.13393	2.28988	0.331686	9.35	8.9704	29.8231	2.4831	7.6722	1.22	0.05	-0.02		2015-09-24	4.95	2.21065
2017-04-20	5	2.40009	2.12876	0.52921	NaN	8.6304	29.976	2.549	2.0056	1.46	0.18	-0.01		2015-09-25	5.06	1.95602
2017-04-26	5	2.45684	2.51234	1.29701	3.14	8.4292	29.647	3.7182	3.7709	1.28	-0.07	-0.01		2015-09-26	5.03	2.83565
2017-05-03	5	2.97613	2.5595	3.46432	10.23	8.0454	29.2327	4.6695	8.9214	1.14	-0.01	0.02		2015-09-27	4.93	3.57639
2017-05-10	5	3.53861	4.56524	11.9198	8.85	7.5506	29.3563	5.3582	4.5554	2.4	0.08	0.03		2015-09-28	4.79	4.4686
2017-05-17	5	3.19922	3.92416	2.40072	15.14	7.3041	28.6935	6.0338	9.5563	0.87	0.52	0.04		2015-09-29	4.2	5.60185
2017-05-24	5	3.56002	3.13853	0.965229	3.44	7.4456	29.5607	5.5301	3.6455	2	0.31	0.04		2015-09-30	2.64	7.34127
2017-05-31	5	4.55873	2.90231	2.05115	6.36	7.935	29.5037	6.6744	5.6185	2.56	0.25	0.01		2015-10-01	0.72	7.01691
2017-06-07	5	8.66089	2.45436	4.8868	3.78	7.2035	29.6762	7.2642	2.0155	1.34	-0.29	-0.03		2015-10-02	0.95	3.23671
2017-06-14	5	11.7444	4.93827	28.9002	4.98	7.3854	29.9042	7.6225	1.5199	1.64	-0.01	-0.02		2015-10-03	1.46	3.61111
2017-06-20	5	5.6127	17.5196	36.3627	3.21	7.4875	29.9026	9.805	2.7444	2.71	0.11	-0.03		2015-10-04	4.42	2.99769
2017-06-28	5	7.26305	4.27753	19.8583	1.35	7.1751	30.44	8.4067	1.9491	6.64	3.61	0.11		2015-10-05	3.95	2.5
2017-07-05	5	10.6913	131.499	500.556	2.95	6.985	30.5256	6.5444	1.1868	1.5	-0.06	-0.01		2015-10-06	2.14	1.58565
2017-07-12	5	6.61006	78.1179	168.776	NaN	7.6454	30.5259	6.6592	1.9337	1.92	-0.14	-0.01		2015-10-07	4.1	1.89815
2017-07-19	5	6.94552	39.9997	60.5531	3.5	7.3326	30.2501	9.9571	4.4712	1.09	-0.29	-0.03		2015-10-08	4.34	3.10185
2017-07-26	5	7.68814	41.6503	42.4871	5.49	7.3167	30.4248	9.6325	4.8088	1.71	-0.04	-0.02		2015-10-09	3.17	2.93981
2017-08-02	5	12.4605	28.1885	30.6888	6.81	7.1771	30.2893	14.9237	7.7622	0.24	-0.1	-0.02		2015-10-10	4.18	7.10648
2017-08-09	5	12.5064	12.7545	13.638	7.39	5.8134	30.1785	18.3489	8.4315	0.55	-0.08	-0.03		2015-10-11	1.45	4.47917
2017-08-16	5	17.5073	17.2466	21.6183	6.94	5.6372	30.2856	15.3384	9.6603	0.81	-0.04	-0.03		2015-10-12	3.77	2.74306
2017-08-23	5	15.7253	18.3298	29.2316	5.63805	6.1088	30.315	13.691	7.3499	2.12	-0.03	0.01		2015-10-13	0.47	3.76157
2017-08-30	5	10.1391	20.083	9.78951	6.20186	6.1789	30.4558	12.7544	8.5759	1.49	-0.1	-0.02		2015-10-14	3.79	5.17361
2017-09-06	5	10.458	19.0118	6.35392	6.36294	6.2032	30.2649	14.6669	6.2909	2.53	0.21	0.04		2015-10-15	3.85	3.86574
2017-09-13	5	18.1522	39.3562	22.3936	1.69498	5.2982	30.315	13.2047	4.6584	2.53	0.2	0.05		2015-10-16	3.19	4.4213
2017-09-20	5	19.4386	42.708	17.44	2.77875	5.6582	30.4933	15.6035	4.7878	3.09	-0.06	0		2015-10-17	3.81	2.84722
2017-09-27	5	22.1115	56.9786	29.0811	7.26422	6.3439	30.2693	17.2057	11.1869	0.88	-0.01	-0.02		2015-10-18	3.04	4.81481
2017-10-04	5	13.62	36.8748	4.37479	7.5191	5.1526	29.9202	16.0495	10.8506	0.39	-0.16	-0.01		2015-10-19	3.76	5
2017-10-11	5	9.35661	20.017	9.98468	11.5973	5.0527	30.0886	15.9288	22.2825	1.2	-0.03	0.01		2015-10-20	0.95	5.71759
2017-10-18	5	8.74379	16.1288	5.40885	4.30908	5.5679	30.0978	14.276	7.9211	1.82	0.57	0.11		2015-10-21	3.5	3.53009
2017-10-25	5	10.9262	14.9422	22.0666	3.48351	6.3597	30.376	13.8806	10.2486	0.27	0.01	0.01		2015-10-22	1.77	4.1088
2017-11-01	5	21.1148	24.5183	37.0737	1.096	5.606	30.356	13.6991	7.0332	2.1	0.61	0.08		2015-10-23	2.81	6.08796
2017-11-08	5	25.5801	26.1221	19.6384	0.923957	5.4926	30.2552	13.038	5.568	5.87	1.73	0.18		2015-10-24	2.54	2.68519
2017-11-15	5	21.1737	30.8504	28.0064	1.03866	5.5526	30.2266	11.3338	3.3447	7.92	2.73	0.23		2015-10-25	0.86	4.71065
2017-11-22	5	9.22557	26.0733	59.9046	1.15557	6.0153	29.6701	9.8573	5.8461	8.98	3.97	0.32		2015-10-26	2.87	4.54861
2017-11-28	5	8.5169	27.324	96.8151	0.066406	5.4583	29.4804	9.4934	3.2928	NaN	NaN	NaN		2015-10-27	3.31	3.36806
2017-12-06	5	5.1118	21.8029	77.6991	0.144838	5.7619	29.9588	8.5535	2.8982	NaN	NaN	NaN		2015-10-28	2.76	2.2338
2017-12-13	5	4.38702	16.6102	61.5191	0.373972	5.9442	28.4095	7.7402	1.657	NaN	NaN	NaN		2015-10-29	0.36	10.6829
2017-12-20	5	7.52521	12.7012	37.0768	NaN	5.216	30.1377	8.2643	1.7261	NaN	NaN	NaN		2015-10-30	2.23	7.16435
2015-01-07	10	NaN	NaN	NaN	0.810906	6.496	30.061	4.4283	0.9402					2015-10-31	3.1	3.51852
2015-01-14	10	NaN	NaN	NaN	1.95969	NaN	30.6279	5.0514	0.9103					2015-11-01	0.44	3.10185
2015-01-21	10	NaN	NaN	NaN	3.95046	6.3701	30.2479	3.6335	1.3121					2015-11-02	2.52	5.16204
2015-01-29	10	NaN	NaN	NaN	0.734883	6.3991	30.1976	3.3906	1.0335					2015-11-03	0.55	1.90972
2015-02-04	10	NaN	NaN	NaN	1.13189	6.9156	29.8249	1.8904	1.1039					2015-11-04	1.35	2.40741
2015-02-11	10	NaN	NaN	NaN	2.56246	7.147	29.7555	0.8825	1.8139					2015-11-05	1.04	1.90972
2015-02-19	10	NaN	NaN	NaN	1.95969	7.4607	29.815	-0.0467	1.7721					2015-11-06	0.71	3.94676
2015-02-25	10	NaN	NaN	NaN	3.14969	7.5329	29.7774	-0.153	2.164					2015-11-07	2.72	5.20833
2015-03-04	10	NaN	NaN	NaN	4.03054	7.4613	30.063	0.6285	3.085					2015-11-08	2.53	7.43056
2015-03-11	10	NaN	NaN	NaN	4.67115	6.8847	30.5993	1.4134	1.7834					2015-11-09	2.66	4.62963
2015-03-17	10	NaN	NaN	NaN	12.1636	7.5295	30.5016	0.9437	4.9615					2015-11-10	2.66	2.00231
2015-03-25	10	NaN	NaN	NaN	14.8666	8.4551	30.4182	0.5597	8.2084					2015-11-11	0.58	3.58796
2015-04-01	10	NaN	NaN	NaN	14.2753	8.752	30.3264	0.6996	10.4156					2015-11-12	1.64	3.11343
2015-04-08	10	NaN	NaN	NaN	8.27799	8.1405	30.2941	0.7998	9.8696					2015-11-13	1.21	5.38194
2015-04-15	10	NaN	NaN	NaN	6.32608	8.3379	30.2869	0.8732	6.8239					2015-11-14	1.55	6.13426
2015-04-20	10	NaN	NaN	NaN	7.74077	8.2315	30.3895	0.6884	5.5512					2015-11-15	1.19	6.5625
2015-04-29	10	NaN	NaN	NaN	3.09631	8.0039	30.0064	1.2053	1.3754					2015-11-16	1.97	4.75694
2015-05-06	10	NaN	NaN	NaN	1.47821	7.8492	29.9122	1.8571	0.969					2015-11-17	1.64	4.20139
2015-05-13	10	NaN	NaN	NaN	0.536515	7.4661	30.3253	1.4656	0.9158					2015-11-18	0.95	2.52315
2015-05-20	10	NaN	NaN	NaN	0.774077	7.326	30.2969	2.3036	1.4957					2015-11-19	1.39	2.56944
2015-05-27	10	NaN	NaN	NaN	0.72	7.25	30.47	2	1.94					2015-11-20	0.58	8.32176
2015-06-03	10	13.3193	6.2256	15.5996	1.17	7	30.58	1.95	1.98					2015-11-21	0.91	5.54398
2015-06-10	10	NaN	NaN	NaN	7.07	7.25	30.26	3.75	11.48					2015-11-22	0.62	8.20602
2015-06-17	10	6.98131	4.14587	8.97948	0.73	7.04	30.45	3.99	1.6					2015-11-23	0.34	11.1227
2015-06-24	10	NaN	NaN	NaN	8.19	6.84	30.32	5.1	1.94					2015-11-24	0.9	6.77083
2015-06-30	10	9.40648	2.69567	4.0302	6.43	6.58	29.76	8.64	21.05					2015-11-25	2.28	3.20602
2015-07-08	10	NaN	NaN	NaN	6.17	6.1	30.14	6.9	NaN					2015-11-26	2.16	3.1713
2015-07-15	10	12.0203	2.30701	6.5308	2.69	6.02	30.28	6.67	1.91					2015-11-27	1.94	5.625
2015-07-22	10	NaN	1.90765	2.30925	1.47	5.78	30.06	8.73	2.82					2015-11-28	0.16	2.83565
2015-07-29	10	17.6848	47.3401	42.7638	1.6	5.87	29.72	15.02	2.47					2015-11-29	1.19	4.25926
2015-08-05	10	17.5782	19.4093	21.959	1.32	5.6	30.3	9.02	1.13					2015-11-30	1.84	3.34491
2015-08-12	10	NaN	NaN	NaN	3.15	6.08	30.36	9.22	3.93					2015-12-01	2.1	3.4375
2015-08-19	10	NaN	NaN	NaN	6.12	5.32	30.06	12.64	9.51					2015-12-02	0.54	1.62037
2015-08-26	10	18.2603	23.7204	15.8755	15.14	5.59	29.9	14.7	10.21					2015-12-03	0.34	1.81713
2015-09-02	10	17.5782	NaN	NaN	10.17	4.89	30.17	12.52	3.55					2015-12-04	1.51	5.85648
2015-09-09	10	21.1662	19.2091	84.2986	8.86	5.46	30.5	10.11	3.46					2015-12-05	1	3.54167
2015-09-17	10	17.8591	31.3658	41.8793	5.06	5.07	30.38	10.97	2.86					2015-12-06	1.78	3.58796
2015-09-23	10	13.8627	23.3229	44.0688	6.05	5.43	30.56	9.83	5.67					2015-12-07	1.82	3.14815
2015-09-30	10	15.4029	50.9658	92.3342	6.61	6.11	30.26	13.15	4.82					2015-12-08	1.23	2.62731
2015-10-07	10	12.7704	35.3844	49.0888	NaN	5.39	30.13	12.67	1.42					2015-12-09	0.9	2.30324
2015-10-15	10	9.71889	40.7933	32.9295	4.8	5.36	29.8	12.89	1.21					2015-12-10	0.87	1.71296
2015-10-21	10	7.29766	23.0116	12.1468	2.59	5.26	29.83	11.7	1.95					2015-12-11	0.67	4.38657
2015-10-29	10	7.36758	14.2125	19.7817	3.18	5.67	30.06	10.28	5.48					2015-12-12	1.51	3.76157
2015-11-04	10	8.53906	13.8171	23.2845	NaN	5.36	30.1	10.34	1.97					2015-12-13	1.89	4.46759
2015-11-10	10	6.11748	11.6666	7.96921	7.47	5.5	30.12	10.02	4.49					2015-12-14	0.91	1.94444
2015-11-18	10	5.30391	8.0254	4.56371	12.05	5.72	29.96	8.95	7.68					2015-12-15	0.45	8.84259
2015-11-25	10	3.31904	5.19873	3.31813	8.39	6.05	29.74	9.06	4.55					2015-12-16	1.6	5.24306
2015-12-02	10	5.54114	4.43063	4.95068	1.21	5.48	29.99	8.71	1.53					2015-12-17	0.78	2.95139
2015-12-09	10	5.5582	5.0878	22.499	2.6	5.56	29.91	7.88	2.78					2015-12-18	0.45	4.34028
2015-12-16	10	4.73257	5.09022	21.9932	2.18	5.87	29.95	7.42	3.14					2015-12-19	1.67	7.78935
2016-01-06	10	4.38025	4.20498	6.02309	2.63	6.04	30.26	6.03	3.63					2015-12-20	1.85	9.21296
2016-01-14	10	3.37984	2.84978	6.41889	2.7	6.42	29.78	4.87	4.89					2015-12-21	0.58	3.90046
2016-01-20	10	4.0191	2.67313	6.14787	1.99	5.92	30.28	5.02	1.97					2015-12-22	0.74	3.53009
2016-01-27	10	NaN	NaN	NaN	2.22	5.81	30.53	4.1	2.26					2015-12-23	0.93	2.77778
2016-02-04	10	2.83905	2.47686	13.2797	1.17	6.45	30.38	3.64	1.65					2015-12-24	0.35	5.99537
2016-02-10	10	4.12404	1.87779	11.4617	0.86	6.72	29.99	3.11	1.14					2015-12-25	1.82	1.49306
2016-02-17	10	2.13968	2.06196	12.9917	1.06	7.24	29.69	2.57	1.36					2015-12-26	1.91	3.29861
2016-02-24	10	2.58687	2.02534	11.9331	1.04	7.11	29.89	2.49	1.26					2015-12-27	0.18	1.80556
2016-03-02	10	2.57806	1.88153	8.56714	2.32	6.98	29.86	2.69	1.29					2015-12-28	1.49	5.75231
2016-03-09	10	2.67987	1.84852	9.78642	4.93	7.09	30.21	2.67	3.04					2015-12-29	0.31	2.02546
2016-03-16	10	2.40353	1.66474	10.1671	27.1	7.9	30.05	2.74	14.87					2015-12-30	1.22	2.28009
2016-03-31	10	2.62323	1.58791	10.4864	9.96	7.81	29.98	2.6	6.87					2015-12-31	0.82	1.42361
2016-04-06	10	2.97265	1.64388	11.718	12.76	7.35	30.04	2.67	6.57					2016-01-01	0.85	3.73843
2016-04-13	10	2.63132	1.58425	11.2821	13.72	7.17	29.87	3.65	8.95					2016-01-02	1.94	4.21296
2016-04-20	10	3.74945	1.73227	11.0272	11.66	7.12	30.28	3.19	4.32					2016-01-03	0.45	3.59954
2016-04-28	10	3.98501	2.0618	10.9809	9.2	7.09	30.23	3.67	10.29					2016-01-04	1.54	3.32176
2016-05-04	10	4.39082	3.43708	12.1953	4.07	7.21	30.2	4.38	3.56					2016-01-05	1.65	4.05093
2016-05-11	10	6.05469	NaN	NaN	4.62	7.08	30.11	4.65	3.58					2016-01-06	2.07	3.76157
2016-05-18	10	5.04577	7.07679	32.6229	1.54	6.57	30.32	4.43	4.85					2016-01-07	2.07	2.2338
2016-05-25	10	5.26937	4.56034	18.4425	0.87	5.98	30.59	3.74	1.72					2016-01-08	1.73	2.03704
2016-06-01	10	5.02115	11.4683	10.142	3.53	6.3	30.51	5.36	4.16					2016-01-09	0.75	2.04861
2016-06-07	10	7.92402	9.1681	6.96304	4.68	6.96	30.37	7.11	7.55					2016-01-10	1.37	9.84568
2016-06-15	10	7.25693	10.4296	11.103	1.75	6.27	30.27	7.73	2.83					2016-01-11	1.69	9.58333
2016-06-22	10	8.82187	15.2156	99.5071	10.01	6.7	30.66	6.59	8.29					2016-01-12	2.16	4.97685
2016-06-29	10	11.9143	48.6038	66.9531	3.24	7.19	30.6	8.08	5.93					2016-01-13	1.78	7.52315
2016-07-06	10	10.28	35.3111	98.9971	4.68	6.63	30.65	7.94	6.07					2016-01-14	1.92	6.57407
2016-07-13	10	8.38248	30.7479	55.3434	7.4	6.5	30.55	9.38	5.73					2016-01-15	2.31	5.82176
2016-07-20	10	10.1972	31.7268	47.7357	6.34	5.93	30.49	10.96	4.04					2016-01-16	0.27	3.55324
2016-07-27	10	10.5089	27.1416	50.2046	3.79	5.55	30.7	8.97	2.31					2016-01-17	1.48	3.49537
2016-08-03	10	9.62536	17.9927	50.8447	2.94	5.78	30.66	10.44	3.75					2016-01-18	1.17	3.0787
2016-08-10	10	10.3811	17.2118	53.3671	3.34	5.34	30.72	10.04	2.2					2016-01-19	1.37	7.47685
2016-08-18	10	33.1029	38.3506	68.3604	4.89	5.93	30.48	14.55	4.73					2016-01-20	2.02	7.98611
2016-08-24	10	45.0895	90.8359	21.5097	6.07	5.78	30.32	17.32	6.38					2016-01-21	2.41	5.43981
2016-08-31	10	34.3026	62.1608	23.0672	3.81	5.45	30.62	12.07	3.51					2016-01-22	2.23	4.60648
2016-09-07	10	16.7601	27.5532	11.7753	9.35	5.9	30.75	12.02	13.02					2016-01-23	1.83	2.02546
2016-09-14	10	12.6414	13.1506	1.79962	4.36	5.72	30.42	16.96	6.61					2016-01-24	1.74	4.4213
2016-09-21	10	12.3058	8.9344	2.08348	6.83	5.47	30.75	11.68	19.38					2016-01-25	2.58	2.41898
2016-09-28	10	8.98479	9.95865	3.12395	4.56	5.92	30.55	13.01	16.53					2016-01-26	2.53	5.0463
2016-10-05	10	9.28874	11.6556	12.3113	8.12	6.27	30.26	13.95	18.36					2016-01-27	0.62	5.21991
2016-10-12	10	8.3854	15.2117	9.16031	1.5	5.97	29.8	14.24	13.29					2016-01-28	2.7	2.5
2016-10-19	10	7.85352	14.6083	9.48574	19.45	6.39	29.47	14.06	15.37					2016-01-29	0.63	3.72685
2016-10-26	10	7.50341	12.1182	6.57431	1.99	5.07	29.6	13.65	1.27					2016-01-30	1.3	4.83796
2016-11-02	10	5.47416	6.84534	4.44496	3.25	4.99	30.12	9.5	1.49					2016-01-31	1.92	3.10185
2016-11-09	10	5.14534	5.80606	4.26625	8.38	4.99	30.16	9.31	4.21					2016-02-01	1.6	4.47917
2016-11-16	10	4.38789	5.62843	2.486	3.24	5.42	29.92	9.2	3.11					2016-02-02	2.89	4.20139
2016-11-23	10	4.02621	4.16618	1.51593	2	5.06	30.1	9.4	0.46					2016-02-03	1.91	3.94676
2016-11-30	10	3.23148	3.65568	1.60218	2.37	5.85	29.71	8.32	1.76					2016-02-04	0.26	5.96065
2016-12-07	10	3.21453	3.63869	1.5711	1.73	5.86	29.41	7.73	1.54					2016-02-05	0.58	2.65046
2016-12-14	10	3.43867	3.37084	1.66702	1.2	6.28	29.37	5.98	1.11					2016-02-06	3.07	6.64352
2016-12-21	10	2.51566	3.37428	1.39765	0.64	6.17	29.48	5.25	0.68					2016-02-07	2.78	5.20833
2017-01-04	10	3.12069	3.49582	3.18388	1.19	6.5825	29.2363	4.3889	0.8336					2016-02-08	0.31	4.46759
2017-01-11	10	3.32436	3.2134	1.06504	0.68	6.8259	29.5102	3.4673	0.6012					2016-02-09	2.13	3.41435
2017-01-18	10	2.1587	2.64988	2.21076	0.36	6.6135	29.883	3.7643	0.4605					2016-02-10	1.53	2.90509
2017-01-25	10	1.66004	2.64365	3.0685	0.35	6.4924	30.252	3.7269	0.3748					2016-02-11	1.35	2.41898
2017-02-01	10	1.30992	2.58541	2.36244	0.26	6.5446	30.3091	3.3615	0.3898					2016-02-12	2.33	5.83333
2017-02-08	10	2.08574	2.1901	1.40279	0.83	7.0258	30.194	2.3316	0.7465					2016-02-13	1.07	2.95139
2017-02-15	10	2.36278	2.41481	1.96462	0.86	6.9098	30.404	1.9877	0.8228					2016-02-14	1.04	5.78704
2017-02-22	10	1.86643	2.08386	1.02676	0.91	7.0627	30.3205	1.6944	0.8246					2016-02-15	3.59	5.3125
2017-03-01	10	3.33976	1.95923	6.47148	1.32	7.0839	30.047	2.1517	1.2847					2016-02-16	2.56	7.29167
2017-03-08	10	2.27519	2.66904	5.26098	2.08	6.9576	30.2329	1.771	1.6519					2016-02-17	1.73	6.84028
2017-03-15	10	2.14646	2.63625	3.44153	NaN	7.4794	30.2877	1.2536	2.8226					2016-02-18	3.52	2.52315
2017-03-22	10	2.4499	3.63954	7.80523	3.81	7.3961	30.5632	1.5225	5.142					2016-02-19	3.76	3.99306
2017-03-29	10	2.76896	4.31658	2.30242	5.71	7.9775	30.3381	1.2999	5.7272					2016-02-20	1.48	4.40972
2017-04-05	10	2.08587	2.59346	0.485016	20.66	8.4889	30.2574	1.4677	14.4448					2016-02-21	1.85	4.23611
2017-04-12	10	2.25871	2.80567	0.345186	19.4	8.4473	30.0888	1.9961	21.7617					2016-02-22	3.9	4.40972
2017-04-20	10	2.90497	2.5418	1.27214	NaN	8.3032	30.2704	1.5368	1.0416					2016-02-23	4.08	2.10648
2017-04-26	10	2.93498	2.38401	1.00992	3.66	8.1841	30.0925	2.4847	2.6387					2016-02-24	1.28	4.62963
2017-05-03	10	3.52848	2.38317	1.79712	3.54	7.8791	29.9236	3.0113	2.2778					2016-02-25	0.78	11.2963
2017-05-10	10	2.98503	2.85381	3.25451	2.26	7.5875	29.713	4.0372	1.8401					2016-02-26	3.19	9.23611
2017-05-17	10	4.03744	3.21342	3.57869	1.71	7.2086	29.3996	4.8284	0.7099					2016-02-27	4.28	5.48611
2017-05-24	10	4.07569	2.91332	1.7417	4.24	7.2336	30.2807	3.6854	1.4027					2016-02-28	3.85	4.76852
2017-05-31	10	4.80025	2.87899	1.31096	12.17	7.2069	29.9856	4.7137	5.1822					2016-02-29	4.24	7.61574
2017-06-07	10	12.2482	1.90994	4.00182	6.48	7.0672	30.0878	5.3541	4.0501					2016-03-01	4.31	5.2662
2017-06-14	10	9.86472	2.87035	10.474	7.84	6.8951	30.1456	5.8007	5.2851					2016-03-02	1.68	8.11343
2017-06-20	10	8.95868	7.27036	95.6615	6	7.1721	30.1842	6.66	4.8405					2016-03-03	4.55	8.32176
2017-06-28	10	7.39894	3.06292	9.38265	1.8	6.4608	30.617	5.8323	4.033					2016-03-04	4.34	3.41435
2017-07-05	10	7.21104	10.7557	61.2863	8.31	6.2974	30.7584	5.1087	3.7654					2016-03-05	1.26	6.5625
2017-07-12	10	6.52371	16.5838	91.6538	7.13	6.7013	30.8756	5.1863	5.1299					2016-03-06	4.54	3.21759
2017-07-19	10	7.47334	27.6934	97.6562	6.49	7.318	30.8049	5.7864	5.7943					2016-03-07	4.41	3.20602
2017-07-26	10	7.28313	19.3427	62.6305	9.15	6.857	30.7257	7.1743	5.4738					2016-03-08	4.32	3.63426
2017-08-02	10	11.9005	23.2036	51.9767	14.6	6.8546	30.4002	13.3178	13.8331					2016-03-09	1.73	3.37963
2017-08-09	10	16.107	15.5623	24.9744	5.56	5.6175	30.3356	15.807	2.3937					2016-03-10	2.43	2.55787
2017-08-16	10	10.7902	12.0261	16.4487	2.2	5.2773	30.5327	11.6376	1.2098					2016-03-11	1.61	2.60417
2017-08-23	10	12.7347	10.6735	21.8844	6.10118	5.4767	30.6061	10.3828	5.1251					2016-03-12	2.91	2.90509
2017-08-30	10	9.56365	12.2061	11.2293	6.12131	5.5723	30.738	9.4381	5.2293					2016-03-13	3.83	6.26157
2017-09-06	10	10.3075	18.6452	8.65285	7.0677	5.9833	30.2981	14.5732	7.1833					2016-03-14	5.1	3.58796
2017-09-13	10	16.165	25.8382	29.8384	1.34452	5.5291	30.7302	10.4369	3.3333					2016-03-15	3.14	5.12731
2017-09-20	10	21.6806	49.5675	38.0149	3.96677	5.6568	30.4942	15.5075	4.9351					2016-03-16	2	3.7037
2017-09-27	10	21.684	53.7863	41.7352	7.26422	5.3483	30.3617	16.3155	5.2774					2016-03-17	2.2	2.59259
2017-10-04	10	14.3929	35.4132	12.0747	3.40297	4.9451	30.198	15.5318	2.5429					2016-03-18	2.09	3.10185
2017-10-11	10	12.2567	24.4345	12.7605	2.6378	4.7541	30.2979	15.1342	1.4523					2016-03-19	3.87	4.7338
2017-10-18	10	9.85015	17.2294	8.28016	0.885725	4.6472	30.4165	14.2778	2.707					2016-03-20	5.62	3.33333
2017-10-25	10	10.5352	14.2723	12.4382	3.62446	4.8454	30.6063	13.3816	8.2856					2016-03-21	2.83	5.20833
2017-11-01	10	18.4131	21.6461	28.0073	0.362446	5.3831	30.4179	13.6684	4.6677					2016-03-22	5.58	9.40972
2017-11-08	10	25.7511	25.8706	15.7945	0.809259	5.4488	30.2539	13.041	5.4547					2016-03-23	1.52	3.4838
2017-11-15	10	21.3824	30.0487	29.0491	1.29354	5.5211	30.2279	11.3315	3.3434					2016-03-24	1.95	2.84722
2017-11-22	10	10.2331	19.6562	49.9878	0.941188	5.9317	29.6873	9.8753	5.1877					2016-03-25	1.8	5.78704
2017-11-28	10	10.3342	18.339	54.4201	0.0590857	5.0605	30.1172	10.0614	1.5237					2016-03-26	4.01	4.43287
2017-12-06	10	5.2249	20.871	75.4773	0.151998	5.6848	30.0329	8.5769	2.7625					2016-03-27	3.98	2.46528
2017-12-13	10	5.42531	16.2381	56.3865	0.351391	5.5669	29.8581	8.4072	0.6613					2016-03-28	2.46	5.45139
2017-12-20	10	7.78321	10.1883	21.2257	NaN	4.1761	30.7704	8.3846	0.3798					2016-03-29	3.67	9.53704
2015-01-07	60	NaN	NaN	NaN	0.0684202	1.1288	31.2776	5.2485	0.6184					2016-03-30	6.11	5.87963
2015-01-14	60	NaN	NaN	NaN	0.0861587	NaN	31.1777	5.3643	0.6245					2016-03-31	5.77	5.53241
2015-01-21	60	NaN	NaN	NaN	0.206105	3.476	31.1559	5.1623	0.6611					2016-04-01	1.11	9.88426
2015-01-29	60	NaN	NaN	NaN	0.114034	3.3388	31.1783	5.1212	0.6123					2016-04-02	0.43	2.56944
2015-02-04	60	NaN	NaN	NaN	0.101363	3.6513	31.1449	5.0685	0.6001					2016-04-03	1.55	5.42824
2015-02-11	60	NaN	NaN	NaN	0.1115	3.0684	31.1856	5.0793	0.5879					2016-04-04	6.21	7.39583
2015-02-19	60	NaN	NaN	NaN	0.116568	2.9659	31.1753	5.043	0.5879					2016-04-05	3.73	3.49034
2015-02-25	60	NaN	NaN	NaN	0.194854	2.9371	31.126	4.6379	0.6733					2016-04-06	6.53	5.33565
2015-03-04	60	NaN	NaN	NaN	0.616592	6.9708	30.8413	1.2617	0.9126					2016-04-07	5.36	9.43287
2015-03-11	60	NaN	NaN	NaN	1.04742	7.2971	30.8557	1.1602	1.3761					2016-04-08	1.64	8.41435
2015-03-17	60	NaN	NaN	NaN	0.886928	7.3075	30.8843	1.125	1.0018					2016-04-09	5.82	4.65278
2015-03-25	60	NaN	NaN	NaN	0.456438	7.0578	30.8598	1.1934	0.8238					2016-04-10	5.22	6.38889
2015-04-01	60	NaN	NaN	NaN	0.691331	6.9149	30.8466	1.1973	0.8548					2016-04-11	4.25	4.66435
2015-04-08	60	NaN	NaN	NaN	2.00192	7.1947	30.786	0.8646	1.7131					2016-04-12	1.81	9.45602
2015-04-15	60	NaN	NaN	NaN	2.33135	7.0986	30.7788	0.7369	1.8777					2016-04-13	3.14	4.05093
2015-04-20	60	NaN	NaN	NaN	2.23844	6.7833	30.7781	0.7714	1.7584					2016-04-14	3.02	3.58796
2015-04-29	60	NaN	NaN	NaN	0.988291	6.6252	30.7584	0.6629	1.0383					2016-04-15	1.08	5.625
2015-05-06	60	NaN	NaN	NaN	0.403054	6.2776	30.7725	0.7021	0.7499					2016-04-16	4.52	5.06944
2015-05-13	60	NaN	NaN	NaN	0.293615	7.3352	30.8862	0.5945	0.7363					2016-04-17	6.21	3.44907
2015-05-20	60	NaN	NaN	NaN	0.206105	6.7785	30.865	0.6364	0.6662					2016-04-18	4.88	3.36806
2015-05-27	60	6.58065	2.01827	3.51699	0.19	6.69	30.87	0.79	0.7					2016-04-19	5.91	2.69676
2015-06-03	60	6.53276	2.10045	4.60744	0.31	7.1	31.05	1.32	0.86					2016-04-20	7.01	4.71065
2015-06-10	60	8.62709	2.25952	6.80614	0.45	6.81	31.05	1.32	0.69					2016-04-21	6.76	5.81019
2015-06-17	60	13.8273	2.10874	4.97366	0.26	6.52	31.02	1.29	0.67					2016-04-22	7.01	3.25231
2015-06-24	60	14.1462	1.87725	3.34017	0.21	6.07	31.03	1.31	0.64					2016-04-23	2.45	2.93981
2015-06-30	60	10.9202	1.82256	3.70925	0.18	5.97	31.02	1.3	0.62					2016-04-24	4.73	5.6713
2015-07-08	60	17.5445	1.81107	2.66808	0.32	5.59	31.04	1.31	NaN					2016-04-25	7.13	4.08565
2015-07-15	60	15.8988	1.65868	1.9227	0.28	5.1	31.01	1.32	0.65					2016-04-26	3.74	2.08333
2015-07-22	60	14.0097	NaN	NaN	0.14	4.87	31.01	1.32	0.63					2016-04-27	7.39	3.66898
2015-07-29	60	15.9476	1.62993	2.0806	0.14	4.6	31	1.33	0.64					2016-04-28	6.08	5.34722
2015-08-05	60	17.1252	1.70173	2.37179	0.1	4.48	30.99	1.33	0.64					2016-04-29	7.63	2.92824
2015-08-12	60	9.22847	1.13438	1.67138	0.21	4.4	31.01	1.34	0.62					2016-04-30	7.51	2.22222
2015-08-19	60	NaN	NaN	NaN	0.23	4.17	31.01	1.34	0.66					2016-05-01	7.33	2.59259
2015-08-26	60	19.742	1.57255	1.70612	0.46	3.51	31.02	1.36	0.69					2016-05-02	6.32	4.44444
2015-09-02	60	21.5557	1.74356	2.93144	0.13	3.22	31.02	1.39	0.65					2016-05-03	3.25	4.25505
2015-09-09	60	23.6499	NaN	NaN	0.15	3.08	31.01	1.4	0.64					2016-05-04	3.89	3.1713
2015-09-17	60	20.621	1.67496	2.84238	0.22	2.8	31	1.44	0.72					2016-05-05	1.71	2.73148
2015-09-23	60	21.9545	1.71601	2.6387	0.28	2.66	30.99	1.46	0.71					2016-05-06	3.06	2.25694
2015-09-30	60	20.9632	1.70359	2.08135	1.49	2.3	31	1.5	0.87					2016-05-07	4.18	2.33796
2015-10-07	60	22.2729	1.68368	2.97054	NaN	2.31	31	1.57	0.67					2016-05-08	3.39	3.53009
2015-10-15	60	21.5903	1.75584	3.95804	0.13	2.03	30.99	1.6	0.64					2016-05-09	7.46	8.7037
2015-10-21	60	18.5387	1.70292	5.13525	0.12	1.68	31	1.66	0.61					2016-05-10	7.53	5.52083
2015-10-29	60	23.8131	2.16559	5.46953	0.14	1.57	30.98	1.72	0.65					2016-05-11	6.65	3.59954
2015-11-04	60	23.5878	1.95855	7.75017	0.24	1.11	30.99	1.71	0.63					2016-05-12	7.67	4.12037
2015-11-10	60	23.9917	2.23354	7.86849	1.02	0.89	30.99	1.73	0.62					2016-05-13	7.04	3.90046
2015-11-18	60	15.6371	1.95731	8.68415	0.91	1.02	30.98	1.86	0.64					2016-05-14	2.16	2.66082
2015-11-25	60	25.961	2.51656	10.2853	0.11	0.87	30.99	1.91	0.62					2016-05-15	2.82	3.83102
2015-12-02	60	23.2656	2.47448	11.4521	0.61	0.56	30.98	1.88	0.61					2016-05-16	6.03	7.68519
2015-12-09	60	25.204	2.5234	11.5559	1.21	0.61	30.98	2.04	0.61					2016-05-17	7.59	7.03704
2015-12-16	60	23.4663	2.48519	7.10404	0.85	0.52	30.98	2.03	0.6					2016-05-18	7.77	2.90509
2016-01-06	60	20.5831	2.07546	6.44485	1.86	0.23	30.96	2.18	0.61					2016-05-19	6.35	2.80093
2016-01-14	60	19.0827	2.45066	6.1351	1.5	0.33	30.96	2.35	0.6					2016-05-20	5.09	2.02546
2016-01-20	60	17.6037	1.81951	5.39635	0.85	0.73	30.97	2.8	0.65					2016-05-21	7.82	3.62269
2016-01-27	60	NaN	NaN	NaN	0.16	1.46	30.95	3.27	0.71					2016-05-22	2.54	3.33333
2016-02-04	60	10.8924	NaN	NaN	0.1	1.62	30.94	3.2	0.61					2016-05-23	3.84	3.93519
2016-02-10	60	8.63793	1.7779	11.6971	0.06	2.26	30.94	3.4	0.63					2016-05-24	2.87	2.29167
2016-02-17	60	9.36894	1.9294	12.2785	0.04	2.37	30.93	3.45	0.59					2016-05-25	5.22	2.88194
2016-02-24	60	7.81843	2.01595	10.8194	0.05	2.34	30.93	3.51	0.58					2016-05-26	5.98	3.35648
2016-03-02	60	8.06928	1.89819	8.58432	0.04	2.48	30.92	3.55	0.58					2016-05-27	3.7	3.34491
2016-03-09	60	5.43171	1.94721	9.33875	0.46	4.18	30.86	3.24	0.65					2016-05-28	5.39	3.15972
2016-03-16	60	6.25428	1.87206	9.68455	0.34	3.44	30.88	3.32	0.68					2016-05-29	5.62	3.4375
2016-03-31	60	5.16761	1.79759	9.97739	1.44	3.97	30.83	3.19	1.16					2016-05-30	1.69	3.18287
2016-04-06	60	3.13392	1.84717	10.965	3.91	7.18	30.86	2.5	2.36					2016-05-31	3.54	3.02083
2016-04-13	60	3.24487	1.90759	11.4982	1.18	6.73	30.87	2.55	0.99					2016-06-01	8.17	3.26389
2016-04-20	60	3.70996	1.71753	11.0077	0.82	6.36	30.84	2.58	0.88					2016-06-02	8	3.80787
2016-04-28	60	4.41868	1.94244	10.059	0.42	6.04	30.85	2.6	0.74					2016-06-03	5.13	4.69907
2016-05-04	60	4.76208	1.82808	13.0597	0.43	5.83	30.84	2.62	0.7					2016-06-04	5.8	3.18287
2016-05-11	60	5.18969	NaN	NaN	1.08	5.49	30.83	2.64	1.18					2016-06-05	6.23	3.56481
2016-05-18	60	4.99078	1.73547	2.69285	0.53	5.42	30.82	2.72	0.7					2016-06-06	2.17	5.5787
2016-05-25	60	4.45692	5.63171	17.7511	1.13	6.48	31.03	3.16	1.2					2016-06-07	5.44	3.75
2016-06-01	60	4.26374	4.85672	11.7333	0.25	6.21	31.02	3.16	0.65					2016-06-08	4.43	3.13657
2016-06-07	60	4.66636	4.98558	9.06088	0.29	5.95	31.01	3.17	0.71					2016-06-09	5.84	5.70602
2016-06-15	60	4.87703	4.63764	7.08731	0.96	5.56	31.01	3.16	1.09					2016-06-10	3.94	4.69907
2016-06-22	60	6.61601	4.51533	7.86045	0.35	5.35	31	3.17	0.69					2016-06-11	7.06	3.53009
2016-06-29	60	7.10738	4.15378	7.71773	0.42	5.04	30.98	3.18	0.76					2016-06-12	3.12	3.58796
2016-07-06	60	6.16512	4.10354	8.51351	0.92	4.91	30.97	3.2	1.23					2016-06-13	5.01	3.42593
2016-07-13	60	6.71189	3.79808	6.88488	0.5	4.51	30.96	3.22	1.09					2016-06-14	3.09	5.20833
2016-07-20	60	7.87727	3.69248	8.72902	0.18	4.36	30.97	3.26	0.68					2016-06-15	4.1	4.66435
2016-07-27	60	8.17668	3.67504	8.48686	0.36	3.84	30.97	3.27	0.69					2016-06-16	3.49	3.75
2016-08-03	60	6.8987	3.20138	6.50832	0.38	3.68	30.97	3.32	0.71					2016-06-17	8.25	4.12037
2016-08-10	60	6.4205	3.15293	5.68953	0.12	3.49	30.97	3.39	0.67					2016-06-18	8.34	2.83565
2016-08-18	60	7.19719	2.7724	3.61684	0.07	3.12	30.96	3.39	0.63					2016-06-19	8.28	3.77315
2016-08-24	60	6.57686	2.55822	4.10861	0.12	3.04	30.96	3.45	0.62					2016-06-20	8.37	5.03472
2016-08-31	60	7.86712	2.5458	4.97658	0.85	2.79	30.97	3.51	0.63					2016-06-21	6.26	4.62963
2016-09-07	60	6.5204	2.42969	4.24032	0.76	2.77	30.97	3.62	0.62					2016-06-22	6.2	2.65046
2016-09-14	60	6.46543	2.62466	4.46413	0.06	2.3	30.97	3.63	0.69					2016-06-23	7.48	2.92824
2016-09-21	60	7.78339	1.5264	0.413875	1.5	2.25	30.97	3.7	14.83					2016-06-24	8.18	2.5463
2016-09-28	60	6.86901	2.40061	1.8962	0.61	1.99	30.99	3.79	14.88					2016-06-25	8.14	2.31481
2016-10-05	60	5.93533	2.18092	2.32362	0.28	1.84	30.98	3.92	14.32					2016-06-26	6.62	2.59259
2016-10-12	60	6.36852	2.21794	2.22687	0.1	1.41	30.97	3.89	1.69					2016-06-27	8.11	5.12731
2016-10-19	60	6.85308	2.56927	2.14455	0.08	1.35	30.96	4.01	0.2					2016-06-28	7.81	4.0162
2016-10-26	60	6.44612	2.16532	1.96351	0.04	1.12	30.96	4.07	0.11					2016-06-29	3.07	3.51852
2016-11-02	60	5.53421	4.13551	7.75248	0.11	4.31	31.27	5.74	0.14					2016-06-30	5.66	2.01691
2016-11-09	60	4.57045	4.3195	8.1004	0.14	3.83	31.24	5.63	0.16					2016-07-01	7.77	2.36111
2016-11-16	60	4.34919	4.03503	6.57077	0.61	3.22	31.23	5.59	0.37					2016-07-02	3.82	4.23913
2016-11-23	60	4.00705	3.21352	5.93064	0.15	2.85	31.21	5.56	0.16					2016-07-03	8.12	6.40046
2016-11-30	60	3.9411	3.20487	3.9341	0.1	2.33	31.21	5.5	0.21					2016-07-04	8.06	4.81481
2016-12-07	60	4.18545	3.09965	4.04963	0.13	2.08	31.19	5.48	0.21					2016-07-05	6.8	4.22454
2016-12-14	60	4.09658	2.75967	2.26274	0.13	1.71	31.19	5.46	0.22					2016-07-06	5.99	2.06019
2016-12-21	60	3.22428	2.59312	2.57253	0.1	1.58	31.16	5.44	0.2					2016-07-07	4.23	4.49074
2017-01-04	60	4.33083	2.65761	3.87218	0.05	1.3165	31.1276	5.4014	0.182					2016-07-08	2.69	2.55787
2017-01-11	60	4.6093	2.33469	2.57037	0.05	1.2991	31.091	5.4046	0.1853					2016-07-09	4.14	2.84722
2017-01-18	60	3.03866	1.87084	2.31049	0.04	1.3193	31.081	5.3958	0.1745					2016-07-10	1.19	1.99074
2017-01-25	60	2.72054	1.96292	3.27186	0.04	1.3813	31.053	5.3703	0.1788					2016-07-11	6.06	4.12037
2017-02-01	60	2.27109	1.90111	2.23168	0.06	2.3349	31.1108	4.9668	0.1788					2016-07-12	7.76	1.83575
2017-02-08	60	3.0253	2.13984	3.25993	0.09	2.696	31.0587	4.6238	0.193					2016-07-13	7.85	2.82407
2017-02-15	60	2.96526	2.49824	3.80329	0.09	4.6711	30.9069	3.8119	0.1977					2016-07-14	7.25	6.09954
2017-02-22	60	2.46915	2.51466	3.01993	0.22	5.8646	30.7597	2.2816	0.4183					2016-07-15	5.76	5.55556
2017-03-01	60	3.62439	1.93028	3.39364	0.13	5.9892	30.7361	2.2637	0.2445					2016-07-16	6.68	2.04861
2017-03-08	60	1.96987	2.65289	4.20272	0.39	7.2218	30.9806	1.497	0.3851					2016-07-17	2.72	2.00231
2017-03-15	60	2.56429	2.31047	2.54491	NaN	7.0747	30.9644	1.5055	0.3414					2016-07-18	3.57	2.61574
2017-03-22	60	2.54811	2.80529	4.29818	1.22	7.6374	30.9851	1.0866	1.1417					2016-07-19	6.47	3.19444
2017-03-29	60	2.93775	2.61944	4.25641	0.47	7.3867	30.9706	1.1676	0.316					2016-07-20	7.79	4.43287
2017-04-05	60	2.7537	2.63494	4.44453	0.15	7.267	30.9688	1.1771	0.1972					2016-07-21	7.64	2.55787
2017-04-12	60	3.00808	2.67476	4.25379	1.47	6.9207	30.9675	1.2135	1.0032					2016-07-22	6	6.6088
2017-04-20	60	3.28837	2.51389	4.58626	NaN	6.7818	30.9627	1.2267	0.4864					2016-07-23	2.85	3.0787
2017-04-26	60	4.56761	3.04497	5.36737	0.64	6.2938	30.9587	1.2521	0.25					2016-07-24	6.98	1.90972
2017-05-03	60	4.68288	2.51438	4.79666	0.09	5.8984	30.9548	1.269	0.1239					2016-07-25	7.41	2.28009
2017-05-10	60	4.85419	2.49	2.10891	0.09	5.7945	30.9352	1.2688	0.13					2016-07-26	2.16	2.60417
2017-05-17	60	5.42805	2.71358	4.38361	0.08	5.5024	30.9254	1.2738	0.1515					2016-07-27	6.83	1.875
2017-05-24	60	5.76056	2.81369	3.90462	0.08	5.2723	30.912	1.2822	0.1807					2016-07-28	6.88	2.97454
2017-05-31	60	7.11594	2.83	4.34492	0.07	5.172	30.8955	1.2881	0.1226					2016-07-29	5.02	2.84722
2017-06-07	60	6.13322	2.47483	2.92864	0.08	4.9293	30.894	1.324	0.1362					2016-07-30	7.17	2.41898
2017-06-14	60	6.23354	2.33178	2.90678	0.1	4.8184	30.8809	1.3879	0.1605					2016-07-31	7.29	1.57407
2017-06-20	60	7.42498	2.41658	3.15126	0.16	4.7137	30.8708	1.4441	0.1984					2016-08-01	6.25	2.30324
2017-06-28	60	9.18395	2.46348	2.78396	0.13	4.3748	30.8683	1.4575	0.157					2016-08-02	6.5	2.97454
2017-07-05	60	8.54251	2.36689	3.17846	NaN	4.3478	30.8599	1.5413	0.1848					2016-08-03	7.33	2.69676
2017-07-12	60	9.17586	2.81746	7.19203	0.35	4.3463	30.8743	1.7266	0.2031					2016-08-04	5.29	3.72685
2017-07-19	60	9.10972	3.01299	10.6301	0.71	4.1841	30.8912	1.9581	0.3445					2016-08-05	7.21	4.87269
2017-07-26	60	9.58376	3.25042	11.6661	0.89	4.0738	30.9034	2.1489	0.6245					2016-08-06	6.55	5.3588
2017-08-02	60	9.03368	3.36785	12.2239	0.64	4.1172	30.9155	2.4135	0.4675					2016-08-07	6.66	3.02083
2017-08-09	60	8.98811	3.55015	15.2682	0.53	3.9506	30.9274	2.6198	0.3063					2016-08-08	7.11	4.82639
2017-08-16	60	7.73337	3.46354	14.0077	0.12	3.8467	30.9335	2.7494	0.2368					2016-08-09	6.74	3.57639
2017-08-23	60	4.84023	3.67151	14.7019	0.151019	3.6058	30.9406	2.8412	0.2156					2016-08-10	7.04	2.21065
2017-08-30	60	3.86126	3.71966	12.8674	0.162094	3.4936	30.9408	2.8694	0.2117					2016-08-11	5.14	2.22222
2017-09-06	60	2.3968	3.33653	11.935	0.117795	2.9249	30.944	2.9202	0.2332					2016-08-12	3.01	2.02546
2017-09-13	60	2.37439	3.55964	10.6086	0.0212434	2.8326	30.9455	2.9985	0.2152					2016-08-13	3.07	2.00483
2017-09-20	60	1.68929	3.4634	8.92816	0.0401444	2.7874	30.9484	3.1074	0.2644					2016-08-14	2.8	3.66898
2017-09-27	60	1.59046	2.98152	6.36522	0.0847492	2.3627	30.9511	3.2087	0.1949					2016-08-15	4.36	2.09491
2017-10-04	60	2.69248	2.63592	4.98274	0.127863	2.0457	30.9629	3.2612	0.1994					2016-08-16	6.5	1.84028
2017-10-11	60	1.68414	2.39635	4.31978	0.0672259	1.8418	30.9528	3.297	0.2032					2016-08-17	1.9	4.4213
2017-10-18	60	2.62825	2.33353	2.99902	0.138938	1.3928	30.9533	3.2774	0.19					2016-08-18	6.25	3.95833
2017-10-25	60	4.0901	2.08577	5.62481	0.0430118	1.3447	30.9587	3.3969	0.2285					2016-08-19	6.64	2.99769
2017-11-01	60	2.53	1.95814	2.25096	0.0234583	1.1942	30.9576	3.4253	0.2047					2016-08-20	5.95	2.90509
2017-11-08	60	3.0011	1.84156	2.18476	0.0283559	0.9893	30.9588	3.4701	0.1971					2016-08-21	6.37	3.96991
2017-11-15	60	3.26403	1.62789	2.2214	0.0411002	1.054	30.957	3.543	0.1727					2016-08-22	5.22	4.76852
2017-11-22	60	2.5478	1.77962	3.6659	0.0135489	1.0623	30.9575	3.5801	0.1605					2016-08-23	6.64	5.42824
2017-11-28	60	2.61496	1.48021	2.84034	0.00487431	0.7734	30.9568	3.5967	0.1666					2016-08-24	5.99	2.82609
2017-12-06	60	2.06795	1.81756	2.24198	0.0139728	0.9947	30.9578	3.847	0.1605					2016-08-25	5.54	4.22454
2017-12-13	60	2.96066	1.54453	2.26007	0.0151186	0.8022	30.9555	3.822	0.1666					2016-08-26	3.13	3.46065
2017-12-20	60	5.05367	5.11569	9.84324	NaN	4.8329	31.6182	5.8516	0.197					2016-08-27	5.91	2.75463
														2016-08-28	6.18	2.75463
														2016-08-29	2.03	5.13889
														2016-08-30	5.74	3.57639
														2016-08-31	5.07	2.94686
														2016-09-01	2.14	1.67824
														2016-09-02	3.98	4.05093
														2016-09-03	5.9	2.75463
														2016-09-04	6.13	2.08333
														2016-09-05	5.25	2.30324
														2016-09-06	1.91	2.19907
														2016-09-07	4.52	2.52315
														2016-09-08	5.1	4.07407
														2016-09-09	1.38	3.78472
														2016-09-10	5.65	2.10648
														2016-09-11	2.76	6.89815
														2016-09-12	5.81	6.27315
														2016-09-13	5.62	3.69213
														2016-09-14	5.41	4.96528
														2016-09-15	4.41	4.04589
														2016-09-16	5.44	3.13657
														2016-09-17	5.32	3.59954
														2016-09-18	3.56	4.6875
														2016-09-19	2.02	1.66667
														2016-09-20	2.6	1.49306
														2016-09-21	4.6	2.7662
														2016-09-22	5.11	3.88889
														2016-09-23	1.28	3.06713
														2016-09-24	4.55	3.88889
														2016-09-25	3.6	4.1088
														2016-09-26	4.25	4.36343
														2016-09-27	0.72	2.88194
														2016-09-28	1.87	2.56944
														2016-09-29	4.36	3.90046
														2016-09-30	4.32	1.53935
														2016-10-01	3.38	1.03009
														2016-10-02	0.88	1.28472
														2016-10-03	2.5	3.1713
														2016-10-04	4.57	1.99074
														2016-10-05	4.55	1.16898
														2016-10-06	4.51	1.14583
														2016-10-07	4.05	1.38889
														2016-10-08	4.28	2.83565
														2016-10-09	1.63	2.75463
														2016-10-10	0.87	8.15972
														2016-10-11	4.11	5.08102
														2016-10-12	3.29	1.45202
														2016-10-13	3.16	3.22917
														2016-10-14	2.5	3.26389
														2016-10-15	3.71	2.71991
														2016-10-16	3.57	2.53472
														2016-10-17	3.34	3.84259
														2016-10-18	3.65	3.24074
														2016-10-19	1.38	5.77295
														2016-10-20	3.59	2.03704
														2016-10-21	0.98	6.22685
														2016-10-22	1.38	7.1412
														2016-10-23	2.41	9.59491
														2016-10-24	3.06	6.73611
														2016-10-25	2.19	5.01157
														2016-10-26	2.63	2.19907
														2016-10-27	2.35	3.125
														2016-10-28	0.66	4.51389
														2016-10-29	1.48	3.69213
														2016-10-30	1.23	4.45602
														2016-10-31	1.61	2.16435
														2016-11-01	1.32	3.65741
														2016-11-02	2.45	2.39583
														2016-11-03	0.78	2.32639
														2016-11-04	1.38	3.75
														2016-11-05	1.98	2.40741
														2016-11-06	0.79	1.85185
														2016-11-07	1.74	2.39583
														2016-11-08	2.54	1.22685
														2016-11-09	2.27	1.16898
														2016-11-10	NaN	3.26389
														2016-11-11	1.45	6.73611
														2016-11-12	2.59	5.65972
														2016-11-13	2.09	4.79167
														2016-11-14	2.39	2.29167
														2016-11-15	1.74	1.18056
														2016-11-16	0.56	4.69907
														2016-11-17	0.84	1.81713
														2016-11-18	0.57	3.96991
														2016-11-19	0.93	3.13657
														2016-11-20	1.55	3.19444
														2016-11-21	1.99	5.68287
														2016-11-22	0.85	4.34028
														2016-11-23	0.94	5.86806
														2016-11-24	1.64	3.94928
														2016-11-25	0.93	1.65509
														2016-11-26	1.67	2.28009
														2016-11-27	0.3	6.67824
														2016-11-28	1.35	5.34722
														2016-11-29	1.28	3.10185
														2016-11-30	0.97	4.30556
														2016-12-01	0.35	8.13889
														2016-12-02	1.95	7.95833
														2016-12-03	1.29	3.7037
														2016-12-04	1.26	4.74537
														2016-12-05	1.54	2.91667
														2016-12-06	1.93	2.4537
														2016-12-07	0.95	1.44676
														2016-12-08	0.88	1.55093
														2016-12-09	1.54	5.3588
														2016-12-10	0.92	7.01389
														2016-12-11	1.65	6.64352
														2016-12-12	0.23	3.64583
														2016-12-13	1.74	6.59722
														2016-12-14	0.37	1.85185
														2016-12-15	0.34	4.69907
														2016-12-16	1.12	12.2454
														2016-12-17	0.61	5.27778
														2016-12-18	0.18	7.4537
														2016-12-19	0.63	5.11574
														2016-12-20	1.83	2.04861
														2016-12-21	1.56	2.5463
														2016-12-22	0.46	1.27315
														2016-12-23	1.2	3.71528
														2016-12-24	0.56	6.08796
														2016-12-25	1.22	9.25926
														2016-12-26	1.71	4.79167
														2016-12-27	0.48	6.31944
														2016-12-28	0.94	2.1412
														2016-12-29	1.61	3.91204
														2016-12-30	1.78	11.2616
														2016-12-31	1.8	4.38657
														2017-01-01	0.87	6.52778
														2017-01-02	2	5.20833
														2017-01-03	1.98	2.7662
														2017-01-04	1	7.90509
														2017-01-05	1.83	6.62037
														2017-01-06	0.59	2.38426
														2017-01-07	0.95	2.78935
														2017-01-08	1.48	6.06481
														2017-01-09	2.03	6.38889
														2017-01-10	2.05	3.28704
														2017-01-11	0.27	8.20602
														2017-01-12	0.54	6.13426
														2017-01-13	1.84	7.47685
														2017-01-14	2.32	6.8287
														2017-01-15	2.02	4.1088
														2017-01-16	2.31	3.66898
														2017-01-17	2.26	4.39815
														2017-01-18	1.35	2.25694
														2017-01-19	0.91	1.55797
														2017-01-20	1.32	2.60417
														2017-01-21	0.69	3.14815
														2017-01-22	0.99	3.21759
														2017-01-23	2.51	2.67361
														2017-01-24	0.34	4.83796
														2017-01-25	0.78	5.65972
														2017-01-26	1.44	4.76852
														2017-01-27	1.29	5.79861
														2017-01-28	2.59	7.90509
														2017-01-29	1.29	4.6412
														2017-01-30	2.08	1.80556
														2017-01-31	2.2	3.10185
														2017-02-01	1.68	2.00231
														2017-02-02	2.86	3.4838
														2017-02-03	2.89	5.3125
														2017-02-04	2.5	4.29398
														2017-02-05	1.32	3.31019
														2017-02-06	2.14	6.44676
														2017-02-07	2.7	4.93056
														2017-02-08	0.64	3.88889
														2017-02-09	2.03	3.18287
														2017-02-10	1.82	9.1088
														2017-02-11	2.03	2.00231
														2017-02-12	2.61	3.88889
														2017-02-13	0.35	8.32176
														2017-02-14	1.35	7.60417
														2017-02-15	1.56	3.20602
														2017-02-16	1.43	7.53472
														2017-02-17	1.85	6.85185
														2017-02-18	2.43	3.98148
														2017-02-19	2.56	1.86343
														2017-02-20	2.54	4.59491
														2017-02-21	3.91	3.00926
														2017-02-22	3.89	1.43519
														2017-02-23	3.86	2.92824
														2017-02-24	3.07	2.32639
														2017-02-25	3.08	2.31481
														2017-02-26	3.06	7.30324
														2017-02-27	4.27	6.41204
														2017-02-28	4.26	2.60417
														2017-03-01	1.24	5.77546
														2017-03-02	1.5	6.89815
														2017-03-03	4.33	8.41435
														2017-03-04	3.48	7.40741
														2017-03-05	3.57	7.46528
														2017-03-06	4.56	6.15741
														2017-03-07	4.11	2.62731
														2017-03-08	0.57	6.99074
														2017-03-09	3.1	6.48148
														2017-03-10	3.32	6.46991
														2017-03-11	4.4	8.96991
														2017-03-12	2.82	7.11806
														2017-03-13	4.99	3.86574
														2017-03-14	1.97	6.45833
														2017-03-15	3.63	7.68519
														2017-03-16	3.37	7.24537
														2017-03-17	4.02	4.20139
														2017-03-18	3.22	2.40741
														2017-03-19	1.71	3.14815
														2017-03-20	1.69	3.86574
														2017-03-21	5.25	5.68287
														2017-03-22	4.5	3.62269
														2017-03-23	3.65	8.81944
														2017-03-24	5.35	3.81944
														2017-03-25	3.99	2.89352
														2017-03-26	5.98	4.39815
														2017-03-27	1.9	3.7037
														2017-03-28	1.96	3.66898
														2017-03-29	1.11	2.71991
														2017-03-30	2.87	8.3912
														2017-03-31	4.97	6.95602
														2017-04-01	4.46	3.35648
														2017-04-02	2.18	3.53009
														2017-04-03	5.85	6.05324
														2017-04-04	5.6	2.2338
														2017-04-05	2.46	6.77083
														2017-04-06	2.38	7.37269
														2017-04-07	1.56	6.33102
														2017-04-08	5.33	6.5162
														2017-04-09	5.36	2.87037
														2017-04-10	4.05	2.87037
														2017-04-11	5.92	1.95602
														2017-04-12	4.83	3.75
														2017-04-13	6.5	4.0162
														2017-04-14	6.48	3.40278
														2017-04-15	6.71	4.39815
														2017-04-16	2.19	2.87037
														2017-04-17	5.54	3.4375
														2017-04-18	5.96	4.3287
														2017-04-19	6.68	3.91204
														2017-04-20	2.9	3.37963
														2017-04-21	4.37	2.82407
														2017-04-22	2.81	2.87037
														2017-04-23	3.92	3.33333
														2017-04-24	6.29	2.48843
														2017-04-25	7.16	3.84259
														2017-04-26	2.07	5.27778
														2017-04-27	2.39	4.66435
														2017-04-28	3.33	2.8588
														2017-04-29	3.66	2.04861
														2017-04-30	7.49	5.03472
														2017-05-01	1.82	4.40972
														2017-05-02	2.08	5.87963
														2017-05-03	6.59	5.54398
														2017-05-04	7.54	5.46296
														2017-05-05	4.17	4.0162
														2017-05-06	2.83	9.12037
														2017-05-07	2.04	7.07176
														2017-05-08	7.4	5.32407
														2017-05-09	0.84	2.10648
														2017-05-10	4.07	2.2338
														2017-05-11	4.23	2.5463
														2017-05-12	4.58	3.73843
														2017-05-13	7.76	2.87037
														2017-05-14	6.08	6.4372
														2017-05-15	3.25	5.38194
														2017-05-16	3.57	4.75694
														2017-05-17	7.65	5.06944
														2017-05-18	7.44	1.58565
														2017-05-19	7.35	4.81481
														2017-05-20	6.52	6.00694
														2017-05-21	8.21	6.04167
														2017-05-22	7.19	2.40741
														2017-05-23	1.6	3.88889
														2017-05-24	2.69	1.63194
														2017-05-25	4.08	3.14815
														2017-05-26	2.6	4.87269
														2017-05-27	2.16	2.75463
														2017-05-28	5	2.7662
														2017-05-29	8.02	2.92824
														2017-05-30	8.04	3.47222
														2017-05-31	7.27	4.57176
														2017-06-01	6.73	2.68519
														2017-06-02	5.75	3.125
														2017-06-03	5.91	2.21065
														2017-06-04	5.96	3.4375
														2017-06-05	7.21	3.4838
														2017-06-06	4.36	3.72685
														2017-06-07	8.32	3.46065
														2017-06-08	8	2.5
														2017-06-09	1.78	5.17361
														2017-06-10	8.31	5.09259
														2017-06-11	7.59	3.68056
														2017-06-12	7.83	2.15278
														2017-06-13	7.38	3.47222
														2017-06-14	6.86	4.12037
														2017-06-15	5.49	2.92824
														2017-06-16	7.2	3.53009
														2017-06-17	1.19	5.32407
														2017-06-18	5.51	3.09028
														2017-06-19	4.45	4.71065
														2017-06-20	3.5	7.22222
														2017-06-21	5.83	3.51852
														2017-06-22	8.18	4.84954
														2017-06-23	5.15	2.87037
														2017-06-24	2.3	6.33102
														2017-06-25	8.17	3.25231
														2017-06-26	8	3.54167
														2017-06-27	8.15	2.61574
														2017-06-28	5	2.65046
														2017-06-29	6.33	3.45833
														2017-06-30	1.5	3.71528
														2017-07-01	1.74	1.88657
														2017-07-02	3.49	3.29861
														2017-07-03	6.12	3.44907
														2017-07-04	7.52	2.8125
														2017-07-05	8.09	2.34954
														2017-07-06	8.15	4.79469
														2017-07-07	6.14	3.3912
														2017-07-08	4.3	2.25694
														2017-07-09	4.25	3.62269
														2017-07-10	7.81	3.42593
														2017-07-11	4.58	3.37963
														2017-07-12	5.57	2.07176
														2017-07-13	2.59	2.36111
														2017-07-14	7.66	2.39583
														2017-07-15	5.46	2.52315
														2017-07-16	4.98	2.09491
														2017-07-17	5.68	2.1412
														2017-07-18	2.74	2.00231
														2017-07-19	5.74	2.53472
														2017-07-20	6.5	1.44676
														2017-07-21	7.45	2.06522
														2017-07-22	7.47	4.18981
														2017-07-23	7.79	2.657
														2017-07-24	4.11	1.59722
														2017-07-25	1.96	2.30324
														2017-07-26	7.6	2.09491
														2017-07-27	4.78	3.06713
														2017-07-28	2.48	3.53009
														2017-07-29	4.03	1.59722
														2017-07-30	7.09	2.19907
														2017-07-31	7.55	1.86343
														2017-08-01	7.3	1.37731
														2017-08-02	7.31	3.04398
														2017-08-03	6.56	3.75
														2017-08-04	6.1	2.99769
														2017-08-05	7.13	5.12731
														2017-08-06	3.27	5.85648
														2017-08-07	7.34	5.72917
														2017-08-08	1.03	2.17593
														2017-08-09	7.21	3.3912
														2017-08-10	6.92	3.57639
														2017-08-11	6.91	2.01389
														2017-08-12	2.12	2.70833
														2017-08-13	1.72	3.88889
														2017-08-14	6.88	3.50694
														2017-08-15	6.52	2.52315
														2017-08-16	6.26	3.7963
														2017-08-17	6.63	5.71759
														2017-08-18	5.4	1.74769
														2017-08-19	1.37	5.56713
														2017-08-20	4.39	2.93981
														2017-08-21	6.58	2.36111
														2017-08-22	6.36	3.0787
														2017-08-23	1.75	8.70773
														2017-08-24	4.4	2.33796
														2017-08-25	5.99	1.89815
														2017-08-26	6.14	3.7037
														2017-08-27	5.1	1.09954
														2017-08-28	6.41	1.80556
														2017-08-29	6.32	1.77083
														2017-08-30	1.16	0.925926
														2017-08-31	5.6	3.66898
														2017-09-01	5.43	5.3588
														2017-09-02	4.22	5.30093
														2017-09-03	3.28	3.87731
														2017-09-04	5.8	7.09491
														2017-09-05	5.14	5.77546
														2017-09-06	4.81	4.94213
														2017-09-07	1.2	8.05556
														2017-09-08	5.56	3.95833
														2017-09-09	5.78	2.36111
														2017-09-10	4.21	4.50231
														2017-09-11	3.04	7.24537
														2017-09-12	5.59	5.76389
														2017-09-13	5.57	3.75
														2017-09-14	5.18	4.21296
														2017-09-15	3.58	2.48843
														2017-09-16	4.04	3.125
														2017-09-17	2.75	2.17593
														2017-09-18	2.06	2.46528
														2017-09-19	3.11	5.42929
														2017-09-20	1.89	2.36111
														2017-09-21	4.98	3.0314
														2017-09-22	2.77	2.48843
														2017-09-23	2.5	1.26157
														2017-09-24	3.35	1.78241
														2017-09-25	4.56	2.1412
														2017-09-26	4.35	2.16435
														2017-09-27	1.95	3.71528
														2017-09-28	0.67	4.43287
														2017-09-29	4.59	3.99306
														2017-09-30	3.64	2.40741
														2017-10-01	4.71	2.66204
														2017-10-02	4.14	3.78472
														2017-10-03	4.5	2.08333
														2017-10-04	4.08	3.75
														2017-10-05	4.24	4.1088
														2017-10-06	2.97	2.90509
														2017-10-07	4.2	2.38426
														2017-10-08	2.89	6.41204
														2017-10-09	2.42	1.64352
														2017-10-10	2.27	4.67593
														2017-10-11	4.07	3.7963
														2017-10-12	4.15	3.25231
														2017-10-13	4.01	1.79398
														2017-10-14	1.61	4.17824
														2017-10-15	1.8	3.78472
														2017-10-16	2.27	6.11111
														2017-10-17	2.9	4.19192
														2017-10-18	2.9	2.5
														2017-10-19	3.64	3.96991
														2017-10-20	3.58	5.56713
														2017-10-21	3.61	4.07005
														2017-10-22	3.49	1.73611
														2017-10-23	2.91	2.09491
														2017-10-24	3.17	2.17593
														2017-10-25	2.2	6.97917
														2017-10-26	2.47	10.7292
														2017-10-27	2.87	4.9537
														2017-10-28	3.14	2.03704
														2017-10-29	2.89	3.09028
														2017-10-30	0.38	10.9144
														2017-10-31	2.65	6.77083
														2017-11-01	3.04	2.77778
														2017-11-02	2.5	4.05797
														2017-11-03	1.49	5.12731
														2017-11-04	2.95	5.35024
														2017-11-05	1.75	4.77053
														2017-11-06	1.42	9.02778
														2017-11-07	1.49	3.94676
														2017-11-08	0.43	2.73148
														2017-11-09	2.05	2.65152
														2017-11-10	0.97	8.28704
														2017-11-11	2.47	7.19907
														2017-11-12	1.29	1.53935
														2017-11-13	2.03	1.33838
														2017-11-14	0.82	3.96991
														2017-11-15	NaN	3.1401
														2017-11-16	1.28	5.21991
														2017-11-17	1.15	8.35749
														2017-11-18	1.93	6.61836
														2017-11-19	0.53	7.34954
														2017-11-20	1.4	7.92824
														2017-11-21	2.24	5.65972
														2017-11-22	1.8	4.98843
														2017-11-23	1.8	8.19444
														2017-11-24	2.2	3.05556
														2017-11-25	1.72	2.94686
														2017-11-26	0.81	4.23611
														2017-11-27	1.59	6.59722
														2017-11-28	2.12	4.15509
														2017-11-29	0.8	5.90278
														2017-11-30	2.05	3.41435
														2017-12-01	0.37	4.94213
														2017-12-02	1	3.7963
														2017-12-03	0.94	1.78241
														2017-12-04	0.82	3.61111
														2017-12-05	1.17	3.22917
														2017-12-06	0.24	8.55324
														2017-12-07	1.35	2.71991
														2017-12-08	1.71	3.33333
														2017-12-09	0.46	2.09491
														2017-12-10	0.66	4.20139
														2017-12-11	0.69	2.80093
														2017-12-12	0.58	4.18981
														2017-12-13	0.39	8.56481
														2017-12-14	1.26	7.97454
														2017-12-15	1.89	6.38889
														2017-12-16	0.71	4.96528
														2017-12-17	1.96	7.37269
														2017-12-18	1.33	2.92824
														2017-12-19	0.23	3.76157
														2017-12-20	1.87	6.59722
														2017-12-21	1.86	8.46065
														2017-12-22	1.74	4.79167
														2017-12-23	0.47	5.92593
														2017-12-24	1.85	6.66667
														2017-12-25	0.46	8.91204
														2017-12-26	1.24	7.96296
														2017-12-27	1.55	8.90046
														2017-12-28	NaN	7.06019
														2017-12-29	NaN	2.75463
														2017-12-30	NaN	3.68056
														2017-12-31	NaN	6.43519
