# Supplementary material for: A 3-year time series of volatile organic iodocarbons in Bedford Basin, Nova Scotia: a northwestern Atlantic fjord
Source: Copernicus journal article supplement (doi:10.5194/os-14-1385-2018), 2018-11-08
Supplement: Supplementary file 1 [file os-14-1385-2018-supplement.zip]

Archive with 2 entries (2 files):
- os-14-1385-2018-supplement-title-page.pdf
- data supply_iodocarbons_BB_Shi.xlsx
