# Supplementary material for: A 3-year time series of volatile organic iodocarbons in Bedford Basin, Nova Scotia: a northwestern Atlantic fjord
Source: Copernicus journal article supplement (doi:10.5194/os-14-1385-2018), 2018-11-08
Supplement: Supplementary file 1 [file os-14-1385-2018-supplement.zip › os-14-1385-2018-supplement-title-page.pdf]

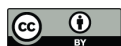

*Supplement of*

**A 3-year time series of volatile organic iodocarbons in Bedford Basin, Nova Scotia: a northwestern Atlantic fjord**

**Qiang Shi and Douglas Wallace**

*Correspondence to:* Qiang Shi (qshi@dal.ca)

- os-14-1385-2018-supplement-title-page.pdf
- data supply\_iodocarbons\_BB\_Shi.xlsx

The copyright of individual parts of the supplement might differ from the CC BY 4.0 License.
